# Supplementary material for: Breviscapine alleviates podocyte injury by inhibiting NF-κB/NLRP3-mediated pyroptosis in diabetic nephropathy
Source: PeerJ. 2023 Feb 13;11:e14826. doi: 10.7717/peerj.14826 (PMC9933739; doi:10.7717/peerj.14826)
Supplement: Supplemental Information 4 [file peerj-11-14826-s004.xlsx]

## Sheet: fig1B
	Control	DN	DN+Ber (15mg/kg)	DN+Ber (30mg/kg)
cell viability	100.75	124.23	112.51	106.19
	99.58	132.11	114.64	115.68
	91.5	139.32	130.11	122.01
	104.62	142.69	128.15	122.95
	90.25	125.8	122.55	107.52
	109.42	129.15	113.65	122.75
	103.9	145.38	129.58	126.78
Mean	100.003	134.097	121.599	117.697	]
SD	6.99216	8.39687	7.89702	8.10638	]

## Sheet: fig1E
	Control	DN	DN+Ber (15mg/kg)	DN+Ber (30mg/kg)
cell viability	0.13	0.18	0.18	0.12
	0.12	0.19	0.14	0.08
	0.12	0.24	0.18	0.16
	0.14	0.23	0.18	0.16
	0.09	0.14	0.13	0.15
	0.15	0.19	0.15	0.15
	0.07	0.17	0.16	0.18
Mean	0.117143	0.191429	0.16	0.142857
SD	0.0281154	0.034365	0.0208167	0.0330224	]

## Sheet: fig1F
	Control	DN	DN+Ber (15mg/kg)	DN+Ber (30mg/kg)
cell viability	13.08	19.43	16.55	17.02
	15.48	19.46	18.08	16.78
	14.61	17.17	17.69	17.83
	14.02	16.95	17.91	16.39
	15.56	17.37	16.6	17.85
	15.52	18.31	19.28	14.81
	13.91	18.73	19.2	16.92
Mean	14.5971	18.2029	17.9014	16.8
SD	0.971712	1.05718	1.09419	1.02914	]
