# Supplementary material for: Breviscapine alleviates podocyte injury by inhibiting NF-κB/NLRP3-mediated pyroptosis in diabetic nephropathy
Source: PeerJ. 2023 Feb 13;11:e14826. doi: 10.7717/peerj.14826 (PMC9933739; doi:10.7717/peerj.14826)
Supplement: Supplemental Information 5 [file peerj-11-14826-s005.xlsx]

## Sheet: fig2A
	Control	HG	HG+Ber (50μm)	HG+Ber (100μm)
cell viability	97.87	51.65	64.54	76.53
	94.53	43.6	73.64	85.61
	107.61	49.65	67.01	76.36
Mean	100.003	48.3	68.3967	79.5
SD	6.79595	4.19136	4.70581	5.2921

## Sheet: fig2C
	Control	HG	HG+Ber (50μm)	HG+Ber (100μm)
cell viability	4.71	15.9	10.42	8.87
	5.11	15.67	11.77	8.36
	4.57	14.35	11.41	9.48
Mean	4.79667	15.3067	11.2	8.90333
SD	0.280238	0.836441	0.699071	0.560744

## Sheet: fig2E-1
	Control	HG	HG+Ber (50μm)	HG+Ber (100μm)
Bax	0.15	0.47	0.25	0.25
	0.14	0.49	0.24	0.22
	0.16	0.5	0.27	0.21
Bcl2	0.38	0.11	0.26	0.25
	0.37	0.11	0.25	0.27
	0.35	0.11	0.24	0.25
β-actin	0.75	0.72	0.77	0.71
	0.72	0.71	0.74	0.77
	0.74	0.73	0.76	0.75
Bax/β-actin ratio	0.2	0.652778	0.324675	0.352113
	0.194444	0.690141	0.324324	0.285714
	0.216216	0.684932	0.355263	0.28
Bcl2/β-actin ratio	0.506667	0.152778	0.337662	0.352113
	0.513889	0.15493	0.337838	0.350649
	0.472973	0.150685	0.315789	0.333333
