# Supplementary material for: Breviscapine alleviates podocyte injury by inhibiting NF-κB/NLRP3-mediated pyroptosis in diabetic nephropathy
Source: PeerJ. 2023 Feb 13;11:e14826. doi: 10.7717/peerj.14826 (PMC9933739; doi:10.7717/peerj.14826)
Supplement: Supplemental Information 6 [file peerj-11-14826-s006.xlsx]

## Sheet: fig3A-1
Area	Aisle	CT	TM	Type	Gene	The sample name
A01	FAM	13.16	80	Unknown	B-actin	Control
A02	FAM	13.29	81	Unknown	B-actin	Control
A03	FAM	13.31	81	Unknown	B-actin	Control
A04	FAM	13.24	78	Unknown	B-actin	Control
A05	FAM	13.31	82	Unknown	B-actin	Control
A06	FAM	13.37	79.5	Unknown	B-actin	Control
A07	FAM	13.4	80	Unknown	B-actin	Control
A08	FAM	13.4	81.5	Unknown	B-actin	Control
A09	FAM	13.32	80.5	Unknown	B-actin	Control
A10	FAM	13.59	81	Unknown	B-actin	HG
A11	FAM	13.56	82	Unknown	B-actin	HG
A12	FAM	13.55	79.5	Unknown	B-actin	HG
B01	FAM	13.52	78	Unknown	B-actin	HG
B02	FAM	13.58	78.5	Unknown	B-actin	HG
B03	FAM	13.43	81.5	Unknown	B-actin	HG
B04	FAM	13.46	78.5	Unknown	B-actin	HG
B05	FAM	13.35	79.5	Unknown	B-actin	HG
B06	FAM	13.52	80.5	Unknown	B-actin	HG
B07	FAM	13.65	78.5	Unknown	B-actin	HG+Ber (50μm)
B08	FAM	13.71	79	Unknown	B-actin	HG+Ber (50μm)
B09	FAM	13.6	81	Unknown	B-actin	HG+Ber (50μm)
B10	FAM	13.55	80.5	Unknown	B-actin	HG+Ber (50μm)
B11	FAM	13.66	81.5	Unknown	B-actin	HG+Ber (50μm)
B12	FAM	13.62	82	Unknown	B-actin	HG+Ber (50μm)
C01	FAM	13.52	78.5	Unknown	B-actin	HG+Ber (50μm)
C02	FAM	13.66	79	Unknown	B-actin	HG+Ber (50μm)
C03	FAM	13.47	79.5	Unknown	B-actin	HG+Ber (50μm)
C04	FAM	13.62	81.5	Unknown	B-actin	HG+Ber (100μm)
C05	FAM	13.66	80	Unknown	B-actin	HG+Ber (100μm)
C06	FAM	13.61	78	Unknown	B-actin	HG+Ber (100μm)
C07	FAM	13.77	79	Unknown	B-actin	HG+Ber (100μm)
C08	FAM	13.8	82	Unknown	B-actin	HG+Ber (100μm)
C09	FAM	13.68	78.5	Unknown	B-actin	HG+Ber (100μm)
C10	FAM	13.73	81.5	Unknown	B-actin	HG+Ber (100μm)
C11	FAM	13.66	80	Unknown	B-actin	HG+Ber (100μm)
C12	FAM	13.69	80.5	Unknown	B-actin	HG+Ber (100μm)
D01	FAM	27.88	79	Unknown	α-SMA	Control
D02	FAM	27.75	82	Unknown	α-SMA	Control
D03	FAM	27.86	79	Unknown	α-SMA	Control
D04	FAM	27.69	79.5	Unknown	α-SMA	Control
D05	FAM	27.83	80	Unknown	α-SMA	Control
D06	FAM	27.65	81.5	Unknown	α-SMA	Control
D07	FAM	27.82	80.5	Unknown	α-SMA	Control
D08	FAM	27.82	81	Unknown	α-SMA	Control
D09	FAM	27.73	82	Unknown	α-SMA	Control
D10	FAM	26.25	79.5	Unknown	α-SMA	HG
D11	FAM	26.27	78	Unknown	α-SMA	HG
D12	FAM	26.21	78.5	Unknown	α-SMA	HG
E01	FAM	26.14	81.5	Unknown	α-SMA	HG
E02	FAM	26.15	78.5	Unknown	α-SMA	HG
E03	FAM	26.03	79.5	Unknown	α-SMA	HG
E04	FAM	26.28	79	Unknown	α-SMA	HG
E05	FAM	26.1	79.5	Unknown	α-SMA	HG
E06	FAM	26.15	82	Unknown	α-SMA	HG
E07	FAM	26.7	81.5	Unknown	α-SMA	HG+Ber (50μm)
E08	FAM	26.76	80.5	Unknown	α-SMA	HG+Ber (50μm)
E09	FAM	26.64	81	Unknown	α-SMA	HG+Ber (50μm)
E10	FAM	26.66	78	Unknown	α-SMA	HG+Ber (50μm)
E11	FAM	26.63	82	Unknown	α-SMA	HG+Ber (50μm)
E12	FAM	26.74	81	Unknown	α-SMA	HG+Ber (50μm)
F01	FAM	26.79	81.5	Unknown	α-SMA	HG+Ber (50μm)
F02	FAM	26.78	79	Unknown	α-SMA	HG+Ber (50μm)
F03	FAM	26.63	80.5	Unknown	α-SMA	HG+Ber (50μm)
F04	FAM	27.09	81.5	Unknown	α-SMA	HG+Ber (100μm)
F05	FAM	27.05	82	Unknown	α-SMA	HG+Ber (100μm)
F06	FAM	27.12	78	Unknown	α-SMA	HG+Ber (100μm)
F07	FAM	27.24	79.5	Unknown	α-SMA	HG+Ber (100μm)
F08	FAM	27.33	81.5	Unknown	α-SMA	HG+Ber (100μm)
F09	FAM	27.22	80	Unknown	α-SMA	HG+Ber (100μm)
F10	FAM	27.32	82	Unknown	α-SMA	HG+Ber (100μm)
F11	FAM	27.4	79	Unknown	α-SMA	HG+Ber (100μm)
F12	FAM	27.35	80.5	Unknown	α-SMA	HG+Ber (100μm)
G01	FAM	28.3	82	Unknown	podocin	Control
G02	FAM	28.33	81	Unknown	podocin	Control
G03	FAM	28.45	78.5	Unknown	podocin	Control
G04	FAM	28.23	79.5	Unknown	podocin	Control
G05	FAM	28.34	80	Unknown	podocin	Control
G06	FAM	28.16	81.5	Unknown	podocin	Control
G07	FAM	28.32	78	Unknown	podocin	Control
G08	FAM	28.38	78.5	Unknown	podocin	Control
G09	FAM	28.44	79	Unknown	podocin	Control
G10	FAM	29.44	80.5	Unknown	podocin	HG
G11	FAM	29.5	81.5	Unknown	podocin	HG
G12	FAM	29.44	82	Unknown	podocin	HG
H01	FAM	29.65	78.5	Unknown	podocin	HG
H02	FAM	29.6	82	Unknown	podocin	HG
H03	FAM	29.5	81.5	Unknown	podocin	HG
H04	FAM	29.21	79.5	Unknown	podocin	HG
H05	FAM	29.38	80.5	Unknown	podocin	HG
H06	FAM	29.21	78	Unknown	podocin	HG
H07	FAM	29.06	82	Unknown	podocin	HG+Ber (50μm)
H08	FAM	29.18	78.5	Unknown	podocin	HG+Ber (50μm)
H09	FAM	29.14	79	Unknown	podocin	HG+Ber (50μm)
H10	FAM	29.13	79.5	Unknown	podocin	HG+Ber (50μm)
H11	FAM	29.16	78	Unknown	podocin	HG+Ber (50μm)
H12	FAM	29.22	80	Unknown	podocin	HG+Ber (50μm)

## Sheet: fig3A-2
Area	Aisle	CT	TM	Type	Gene	The sample name
A01	FAM	29.17	79.5	Unknown	podocin	HG+Ber (50μm)
A02	FAM	29.22	79	Unknown	podocin	HG+Ber (50μm)
A03	FAM	29.33	80.5	Unknown	podocin	HG+Ber (50μm)
A04	FAM	28.89	82	Unknown	podocin	HG+Ber (100μm)
A05	FAM	28.94	81	Unknown	podocin	HG+Ber (100μm)
A06	FAM	28.91	81.5	Unknown	podocin	HG+Ber (100μm)
A07	FAM	29.1	79.5	Unknown	podocin	HG+Ber (100μm)
A08	FAM	28.99	82	Unknown	podocin	HG+Ber (100μm)
A09	FAM	28.99	78.5	Unknown	podocin	HG+Ber (100μm)
A10	FAM	29.12	82	Unknown	podocin	HG+Ber (100μm)
A11	FAM	29.19	80.5	Unknown	podocin	HG+Ber (100μm)
A12	FAM	29.2	81.5	Unknown	podocin	HG+Ber (100μm)
B01	FAM	26.6	81.5	Unknown	podocin	Control
B02	FAM	26.51	80.5	Unknown	podocin	Control
B03	FAM	26.67	78.5	Unknown	podocin	Control
B04	FAM	26.71	79	Unknown	podocin	Control
B05	FAM	26.89	81	Unknown	podocin	Control
B06	FAM	26.8	80.5	Unknown	podocin	Control
B07	FAM	26.66	81.5	Unknown	podocin	Control
B08	FAM	26.64	82	Unknown	podocin	Control
B09	FAM	26.76	78.5	Unknown	podocin	Control
B10	FAM	28.14	79	Unknown	podocin	HG
B11	FAM	28.16	79.5	Unknown	podocin	HG
C01	FAM	28.1	81.5	Unknown	podocin	HG
C02	FAM	28.02	80	Unknown	podocin	HG
C03	FAM	27.85	78	Unknown	podocin	HG
C04	FAM	27.96	79	Unknown	podocin	HG
C05	FAM	27.75	82	Unknown	podocin	HG
C06	FAM	27.72	78.5	Unknown	podocin	HG
C07	FAM	27.58	81.5	Unknown	podocin	HG
C08	FAM	27.4	80	Unknown	podocin	HG+Ber (50μm)
C09	FAM	27.47	80	Unknown	podocin	HG+Ber (50μm)
C10	FAM	27.36	79.5	Unknown	podocin	HG+Ber (50μm)
C11	FAM	27.58	78	Unknown	podocin	HG+Ber (50μm)
C12	FAM	27.48	82	Unknown	podocin	HG+Ber (50μm)
D01	FAM	27.59	81.5	Unknown	podocin	HG+Ber (50μm)
D02	FAM	27.34	80.5	Unknown	podocin	HG+Ber (50μm)
D03	FAM	27.44	78.5	Unknown	podocin	HG+Ber (50μm)
D04	FAM	27.5	79	Unknown	podocin	HG+Ber (50μm)
D05	FAM	27.41	81	Unknown	podocin	HG+Ber (100μm)
D06	FAM	27.42	78	Unknown	podocin	HG+Ber (100μm)
D07	FAM	27.37	82	Unknown	podocin	HG+Ber (100μm)
D08	FAM	27.26	80.5	Unknown	podocin	HG+Ber (100μm)
D09	FAM	27.33	79	Unknown	podocin	HG+Ber (100μm)
D10	FAM	27.38	82	Unknown	podocin	HG+Ber (100μm)
D11	FAM	27.41	79	Unknown	podocin	HG+Ber (100μm)
D12	FAM	27.39	78.5	Unknown	podocin	HG+Ber (100μm)
D13	FAM	27.34	81.5	Unknown	podocin	HG+Ber (100μm)

## Sheet: a-SMA
	B-actin	α-SMA	CT2-CT1		∆CT-Control-∆CT	2-∆∆CT		2-∆∆CT/control-2-∆∆CT	Mean
	CT1	CT2	∆CT	Control-∆CT	∆∆CT	2-∆∆CT	control-2-∆∆CT	control-2-∆∆CT
Control	13.26	27.83	14.57	14.4667	0.103333	0.93088	1.00127	0.929697
	13.31	27.72	14.41	14.4667	-0.0566667	1.04006	1.00127	1.03874
	13.37	27.79	14.42	14.4667	-0.0466667	1.03288	1.00127	1.03156	1	0.0609895
			14.4667			1.00127
HG	13.57	26.24	12.67	14.4667	-1.79667	3.47417	1.00127	3.46975
	13.51	26.11	12.6	14.4667	-1.86667	3.64689	1.00127	3.64226
	13.44	26.18	12.74	14.4667	-1.72667	3.30962	1.00127	3.30542	3.47248	0.168436
HG+Ber (50μm)	13.65	26.7	13.05	14.4667	-1.41667	2.66968	1.00127	2.66629
	13.61	26.68	13.07	14.4667	-1.39667	2.63293	1.00127	2.62958
	13.55	26.73	13.18	14.4667	-1.28667	2.43964	1.00127	2.43654	2.57747	0.123422
HG+Ber (100μm)	13.63	27.09	13.46	14.4667	-1.00667	2.00926	1.00127	2.00671
	13.75	27.26	13.51	14.4667	-0.956667	1.94082	1.00127	1.93836
	13.69	27.36	13.67	14.4667	-0.796667	1.73708	1.00127	1.73488	1.89331	0.141404
group
Control	3	1±0.06
HG	3	3.47±0.17
HG+Ber (50μm)	3	2.58±0.12
HG+Ber (100μm)	3	1.89±0.14

## Sheet: podocin
	B-actin	podocin	CT2-CT1		∆CT-control-∆CT	2-∆∆CT		2-∆∆CT/control-2-∆∆CT	Mean
	CT1	CT2	∆CT	control-∆CT	∆∆CT	2-∆∆CT	control-2-∆∆CT	control-2-∆∆CT
Control	13.26	28.36	15.1	15.0133	0.0866667	0.941696	1.00116	0.940607
	13.31	28.24	14.93	15.0133	-0.0833333	1.05946	1.00116	1.05824
	13.37	28.38	15.01	15.0133	-0.00333333	1.00231	1.00116	1.00115	1	0.058824
			15.0133			1.00116
HG	13.57	29.46	15.89	15.0133	0.876667	0.544624	1.00116	0.543995
	13.51	29.58	16.07	15.0133	1.05667	0.480742	1.00116	0.480186
	13.44	29.27	15.83	15.0133	0.816667	0.567752	1.00116	0.567096	0.530425	0.0450159
HG+Ber (50μm)	13.65	29.13	15.48	15.0133	0.466667	0.723635	1.00116	0.722798
	13.61	29.17	15.56	15.0133	0.546667	0.6846	1.00116	0.683809
	13.55	29.24	15.69	15.0133	0.676667	0.625609	1.00116	0.624886	0.677164	0.0492931
HG+Ber (100μm)	13.63	28.91	15.28	15.0133	0.266667	0.831238	1.00116	0.830277
	13.75	29.03	15.28	15.0133	0.266667	0.831238	1.00116	0.830277
	13.69	29.17	15.48	15.0133	0.466667	0.723635	1.00116	0.722798	0.794451	0.062053
group
Control	3	1±0.06
HG	3	0.53±0.05
HG+Ber (50μm)	3	0.68±0.05
HG+Ber (100μm)	3	0.79±0.06

## Sheet: Synaptopodin
	B-actin	Synaptopodin	CT2-CT1		∆CT-control-∆CT	2-∆∆CT		2-∆∆CT/control-2-∆∆CT	Mean
	CT1	CT2	∆CT	control-∆CT	∆∆CT	2-∆∆CT	control-2-∆∆CT	control-2-∆∆CT
Control	13.26	26.59	13.33	13.38	-0.05	1.03526	1.00144	1.03378
	13.31	26.8	13.49	13.38	0.11	0.926588	1.00144	0.925256
	13.37	26.69	13.32	13.38	-0.06	1.04247	1.00144	1.04097	1	0.0648299
			13.38			1.00144
HG	13.57	28.14	14.57	13.38	1.19	0.438303	1.00144	0.437673
	13.51	27.94	14.43	13.38	1.05	0.482968	1.00144	0.482274
	13.44	27.69	14.25	13.38	0.87	0.547147	1.00144	0.54636	0.488769	0.0546341
HG+Ber (50μm)	13.65	27.41	13.76	13.38	0.38	0.768438	1.00144	0.767333
	13.61	27.55	13.94	13.38	0.56	0.678302	1.00144	0.677327
	13.55	27.43	13.88	13.38	0.5	0.707107	1.00144	0.70609	0.716917	0.0459693
HG+Ber (100μm)	13.63	27.4	13.77	13.38	0.39	0.76313	1.00144	0.762033
	13.75	27.32	13.57	13.38	0.19	0.876606	1.00144	0.875346
	13.69	27.38	13.69	13.38	0.31	0.806642	1.00144	0.805482	0.814287	0.0571673
group
Control	3	1±0.06
HG	3	0.49±0.05
HG+Ber (50μm)	3	0.72±0.05
HG+Ber (100μm)	3	0.81±0.06

## Sheet: fig3C-1
	Control	HG	HG+Ber (50μm)	HG+Ber (100μm)
α-SMA	0.17	0.46	0.24	0.25
	0.14	0.41	0.24	0.25
	0.16	0.46	0.26	0.21
podocin	0.23	0.13	0.17	0.16
	0.24	0.14	0.17	0.17
	0.26	0.13	0.16	0.17
Synaptopodin	0.35	0.15	0.23	0.27
	0.37	0.14	0.26	0.29
	0.38	0.16	0.27	0.29
β-actin	0.78	0.76	0.77	0.72
	0.75	0.74	0.75	0.75
	0.77	0.72	0.74	0.73
α-SMA/β-actin ratio	0.217949	0.605263	0.311688	0.347222
	0.186667	0.554054	0.32	0.333333
	0.207792	0.638889	0.351351	0.287671
podocin/β-actin ratio	0.294872	0.171053	0.220779	0.222222
	0.32	0.189189	0.226667	0.226667
	0.337662	0.180556	0.216216	0.232877
Synap/β-actin ratio	0.448718	0.197368	0.298701	0.375
	0.493333	0.189189	0.346667	0.386667
	0.493506	0.222222	0.364865	0.39726
