# Supplementary material for: Breviscapine alleviates podocyte injury by inhibiting NF-κB/NLRP3-mediated pyroptosis in diabetic nephropathy
Source: PeerJ. 2023 Feb 13;11:e14826. doi: 10.7717/peerj.14826 (PMC9933739; doi:10.7717/peerj.14826)
Supplement: Supplemental Information 7 [file peerj-11-14826-s007.xlsx]

## Sheet: fig4B
	Control	HG	HG+Ber (50μm)	HG+Ber (100μm)
p-p65	0.12	0.34	0.2	0.14
	0.11	0.33	0.2	0.15
	0.13	0.36	0.19	0.16
β-actin	0.76	0.78	0.77	0.78
	0.75	0.76	0.75	0.76
	0.78	0.73	0.76	0.74
p-p65/β-actin ratio	0.157895	0.435897	0.25974	0.179487
	0.146667	0.434211	0.266667	0.197368
	0.166667	0.493151	0.25	0.216216

## Sheet: fig4E-1
	Control	HG	HG+Ber (50μm)	HG+Ber (100μm)
NLRP3	0.14	0.43	0.23	0.19
	0.16	0.45	0.3	0.23
	0.15	0.48	0.29	0.21
Act-cas1	0.09	0.32	0.25	0.17
	0.11	0.29	0.28	0.18
	0.1	0.33	0.26	0.15
β-actin	0.74	0.74	0.75	0.71
	0.76	0.72	0.74	0.75
	0.73	0.75	0.72	0.73
NLRP3/β-actin	0.189189	0.581081	0.306667	0.267606
	0.210526	0.625	0.405405	0.306667
	0.205479	0.64	0.402778	0.287671
Act-cas1/β-actin	0.121622	0.432432	0.333333	0.239437
	0.144737	0.402778	0.378378	0.24
	0.136986	0.44	0.361111	0.205479

## Sheet: fig4F-1
Area	Aisle	CT	TM	Type	Gene	The sample name
A01	FAM	14.53	81	Unknown	B-actin	Control
A02	FAM	14.4	81.5	Unknown	B-actin	Control
A03	FAM	14.4	80	Unknown	B-actin	Control
A04	FAM	14.41	78	Unknown	B-actin	Control
A05	FAM	14.55	80	Unknown	B-actin	Control
A06	FAM	14.56	81.5	Unknown	B-actin	Control
A07	FAM	14.5	80.5	Unknown	B-actin	Control
A08	FAM	14.61	78.5	Unknown	B-actin	Control
A09	FAM	14.61	81.5	Unknown	B-actin	Control
A10	FAM	14.72	81	Unknown	B-actin	HG
A11	FAM	14.77	78	Unknown	B-actin	HG
A12	FAM	14.77	80	Unknown	B-actin	HG
B01	FAM	14.6	81.5	Unknown	B-actin	HG
B02	FAM	14.72	79	Unknown	B-actin	HG
B03	FAM	14.74	82	Unknown	B-actin	HG
B04	FAM	14.64	79.5	Unknown	B-actin	HG
B05	FAM	14.68	81	Unknown	B-actin	HG
B06	FAM	14.53	79	Unknown	B-actin	HG
B07	FAM	14.85	78	Unknown	B-actin	HG+Ber (50μm)
B08	FAM	14.78	80.5	Unknown	B-actin	HG+Ber (50μm)
B09	FAM	14.87	81	Unknown	B-actin	HG+Ber (50μm)
B10	FAM	14.73	81.5	Unknown	B-actin	HG+Ber (50μm)
B11	FAM	14.79	80	Unknown	B-actin	HG+Ber (50μm)
B12	FAM	14.84	78	Unknown	B-actin	HG+Ber (50μm)
C01	FAM	14.77	82	Unknown	B-actin	HG+Ber (50μm)
C02	FAM	14.77	81	Unknown	B-actin	HG+Ber (50μm)
C03	FAM	14.66	81.5	Unknown	B-actin	HG+Ber (50μm)
C04	FAM	14.85	78	Unknown	B-actin	HG+Ber (100μm)
C05	FAM	14.74	78.5	Unknown	B-actin	HG+Ber (100μm)
C06	FAM	14.83	78.5	Unknown	B-actin	HG+Ber (100μm)
C07	FAM	14.91	79.5	Unknown	B-actin	HG+Ber (100μm)
C08	FAM	14.92	81	Unknown	B-actin	HG+Ber (100μm)
C09	FAM	14.97	81.5	Unknown	B-actin	HG+Ber (100μm)
C10	FAM	14.96	78	Unknown	B-actin	HG+Ber (100μm)
C11	FAM	14.83	79.5	Unknown	B-actin	HG+Ber (100μm)
C12	FAM	14.81	79	Unknown	B-actin	HG+Ber (100μm)
D01	FAM	27.7	82	Unknown	IL-18	Control
D02	FAM	27.81	80	Unknown	IL-18	Control
D03	FAM	27.85	81	Unknown	IL-18	Control
D04	FAM	27.9	78.5	Unknown	IL-18	Control
D05	FAM	27.97	80.5	Unknown	IL-18	Control
D06	FAM	28.06	81	Unknown	IL-18	Control
D07	FAM	27.86	82	Unknown	IL-18	Control
D08	FAM	27.85	80	Unknown	IL-18	Control
D09	FAM	27.77	81.5	Unknown	IL-18	Control
D10	FAM	26.66	81	Unknown	IL-18	HG
D11	FAM	26.62	78.5	Unknown	IL-18	HG
D12	FAM	26.65	81.5	Unknown	IL-18	HG
E01	FAM	26.64	78	Unknown	IL-18	HG
E02	FAM	26.55	79	Unknown	IL-18	HG
E03	FAM	26.48	81	Unknown	IL-18	HG
E04	FAM	26.37	81.5	Unknown	IL-18	HG
E05	FAM	26.33	80	Unknown	IL-18	HG
E06	FAM	26.48	78	Unknown	IL-18	HG
E07	FAM	27.14	80	Unknown	IL-18	HG+Ber (50μm)
E08	FAM	27.08	81.5	Unknown	IL-18	HG+Ber (50μm)
E09	FAM	27.07	80.5	Unknown	IL-18	HG+Ber (50μm)
E10	FAM	27.24	78.5	Unknown	IL-18	HG+Ber (50μm)
E11	FAM	27.25	81.5	Unknown	IL-18	HG+Ber (50μm)
E12	FAM	27.15	79	Unknown	IL-18	HG+Ber (50μm)
F01	FAM	27.13	82	Unknown	IL-18	HG+Ber (50μm)
F02	FAM	27.08	80.5	Unknown	IL-18	HG+Ber (50μm)
F03	FAM	27	79.5	Unknown	IL-18	HG+Ber (50μm)
F04	FAM	27.65	79	Unknown	IL-18	HG+Ber (100μm)
F05	FAM	27.53	78	Unknown	IL-18	HG+Ber (100μm)
F06	FAM	27.58	80	Unknown	IL-18	HG+Ber (100μm)
F07	FAM	27.77	79	Unknown	IL-18	HG+Ber (100μm)
F08	FAM	27.76	81	Unknown	IL-18	HG+Ber (100μm)
F09	FAM	27.82	81.5	Unknown	IL-18	HG+Ber (100μm)
F10	FAM	27.5	78	Unknown	IL-18	HG+Ber (100μm)
F11	FAM	27.57	80.5	Unknown	IL-18	HG+Ber (100μm)
F12	FAM	27.41	79.5	Unknown	IL-18	HG+Ber (100μm)
G01	FAM	28.58	78.5	Unknown	IL-1β	Control
G02	FAM	28.73	79	Unknown	IL-1β	Control
G03	FAM	28.59	82	Unknown	IL-1β	Control
G04	FAM	28.5	80	Unknown	IL-1β	Control
G05	FAM	28.62	81	Unknown	IL-1β	Control
G06	FAM	28.48	78	Unknown	IL-1β	Control
G07	FAM	28.67	79.5	Unknown	IL-1β	Control
G08	FAM	28.79	78.5	Unknown	IL-1β	Control
G09	FAM	28.71	80	Unknown	IL-1β	Control
G10	FAM	27.3	81.5	Unknown	IL-1β	HG
G11	FAM	27.25	79	Unknown	IL-1β	HG
G12	FAM	27.28	82	Unknown	IL-1β	HG
H01	FAM	27.27	79.5	Unknown	IL-1β	HG
H02	FAM	27.18	81	Unknown	IL-1β	HG
H03	FAM	27.35	78.5	Unknown	IL-1β	HG
H04	FAM	26.99	81.5	Unknown	IL-1β	HG
H05	FAM	27.14	78	Unknown	IL-1β	HG
H06	FAM	27.13	79	Unknown	IL-1β	HG
H07	FAM	28.06	80.5	Unknown	IL-1β	HG+Ber (50μm)
H08	FAM	28.07	82	Unknown	IL-1β	HG+Ber (50μm)
H09	FAM	27.99	78.5	Unknown	IL-1β	HG+Ber (50μm)
H10	FAM	27.9	81.5	Unknown	IL-1β	HG+Ber (50μm)
H11	FAM	27.87	79	Unknown	IL-1β	HG+Ber (50μm)
H12	FAM	27.8	80	Unknown	IL-1β	HG+Ber (50μm)

## Sheet: fig4F-2
Area	Aisle	CT	TM	Type	Gene	The sample name
A01	FAM	28.07	81	Unknown	IL-1β	HG+Ber (50μm)
A02	FAM	28.04	81.5	Unknown	IL-1β	HG+Ber (50μm)
A03	FAM	27.93	80	Unknown	IL-1β	HG+Ber (50μm)
A04	FAM	28.15	78	Unknown	IL-1β	HG+Ber (100μm)
A05	FAM	28.28	79	Unknown	IL-1β	HG+Ber (100μm)
A06	FAM	28.22	79.5	Unknown	IL-1β	HG+Ber (100μm)
A07	FAM	28.23	82	Unknown	IL-1β	HG+Ber (100μm)
A08	FAM	28.28	80	Unknown	IL-1β	HG+Ber (100μm)
A09	FAM	28.23	81.5	Unknown	IL-1β	HG+Ber (100μm)
A10	FAM	28.2	79	Unknown	IL-1β	HG+Ber (100μm)
A11	FAM	28.11	82	Unknown	IL-1β	HG+Ber (100μm)
A12	FAM	28.03	79.5	Unknown	IL-1β	HG+Ber (100μm)

## Sheet: IL-18
	B-actin	IL-18	CT2-CT1		∆CT-control-∆CT	2-∆∆CT		2-∆∆CT/control-2-∆∆CT	Mean
	CT1	CT2	∆CT	control-∆CT	∆∆CT	2-∆∆CT	control-2-∆∆CT	control-2-∆∆CT
Control	14.44	27.79	13.35	13.36	-0.01	1.00696	1.00177	1.00517
	14.51	27.98	13.47	13.36	0.11	0.926588	1.00177	0.924949
	14.57	27.83	13.26	13.36	-0.1	1.07177	1.00177	1.06988	1	0.0726027
			13.36			1.00177
HG	14.75	26.64	11.89	13.36	-1.47	2.77022	1.00177	2.76532
	14.69	26.56	11.87	13.36	-1.49	2.80889	1.00177	2.80392
	14.62	26.39	11.77	13.36	-1.59	3.01049	1.00177	3.00517	2.85814	0.128788
HG+Ber (50μm)	14.83	27.1	12.27	13.36	-1.09	2.12874	1.00177	2.12497
	14.79	27.21	12.42	13.36	-0.94	1.91853	1.00177	1.91513
	14.73	27.07	12.34	13.36	-1.02	2.02792	1.00177	2.02433	2.02148	0.104949
HG+Ber (100μm)	14.81	27.59	12.78	13.36	-0.58	1.49485	1.00177	1.4922
	14.93	27.78	12.85	13.36	-0.51	1.42405	1.00177	1.42153
	14.87	27.49	12.62	13.36	-0.74	1.67018	1.00177	1.66722	1.52699	0.126484
Group
Control	3	1±0.07
HG	3	2.86±0.13
HG+Ber (50μm)	3	2.02±0.10
HG+Ber (100μm)	3	1.53±0.13

## Sheet: IL-1B
	B-actin	IL-1β	CT2-CT1		∆CT-control-∆CT	2-∆∆CT		2-∆∆CT/control-2-∆∆CT	mean
	CT1	CT2	∆CT	control-∆CT	∆∆CT	2-∆∆CT	control-2-∆∆CT	control-2-∆∆CT
Control	14.44	28.63	14.19	14.1233	0.0666667	0.954842	1.00112	0.953773
	14.51	28.54	14.03	14.1233	-0.0933333	1.06683	1.00112	1.06564
	14.57	28.72	14.15	14.1233	0.0266667	0.981686	1.00112	0.980588	1	0.0584046
			14.1233			1.00112
HG	14.75	27.28	12.53	14.1233	-1.59333	3.01746	1.00112	3.01408
	14.69	27.27	12.58	14.1233	-1.54333	2.91467	1.00112	2.91141
	14.62	27.09	12.47	14.1233	-1.65333	3.1456	1.00112	3.14208	3.02252	0.115564
HG+Ber (50μm)	14.83	28.04	13.21	14.1233	-0.913333	1.88339	1.00112	1.88129
	14.79	27.86	13.07	14.1233	-1.05333	2.07532	1.00112	2.073
	14.73	28.01	13.28	14.1233	-0.843333	1.79419	1.00112	1.79218	1.91549	0.143498
HG+Ber (100μm)	14.81	28.22	13.41	14.1233	-0.713333	1.63959	1.00112	1.63775
	14.93	28.25	13.32	14.1233	-0.803333	1.74513	1.00112	1.74318
	14.87	28.11	13.24	14.1233	-0.883333	1.84463	1.00112	1.84257	1.74117	0.102422
Group
Control	3	1±0.06
HG	3	3.02±0.12
HG+Ber (50μm)	3	1.92±0.14
HG+Ber (100μm)	3	1.74±0.10

## Sheet: fig4H
	Control	HG	HG+Bre (100μm)	HG+Bre (50μm)
cell viability	0.98	2.13	1.67	1.89
	1.08	2.1	1.46	1.73
	0.94	2.36	1.7	1.97
Mean	1	2.19667	1.61	1.86333
SD	0.072111	0.142244	0.130767	0.122202	]
