# Supplementary material for: Breviscapine alleviates podocyte injury by inhibiting NF-κB/NLRP3-mediated pyroptosis in diabetic nephropathy
Source: PeerJ. 2023 Feb 13;11:e14826. doi: 10.7717/peerj.14826 (PMC9933739; doi:10.7717/peerj.14826)
Supplement: Supplemental Information 8 [file peerj-11-14826-s008.xlsx]

## Sheet: fig5A
	Control	HG	HG+Bre (100μm)	HG+Bre (50μm)
cell viability	100.26	46.72	68.01	81.23
	105.96	54.9	72.01	83.26
	93.77	49.28	78.69	73.41
Mean	99.9967	50.3	72.9033	79.3
SD	6.09926	4.1843	5.39575	5.20089	]

## Sheet: fig5B-1
Area	Aisle	CT	TM	Type	Gene	The sample name
A01	FAM	15.06	78	Unknown	B-actin	Control
A02	FAM	15.11	82	Unknown	B-actin	Control
A03	FAM	15.21	81.5	Unknown	B-actin	Control
A04	FAM	15.31	80.5	Unknown	B-actin	Control
A05	FAM	15.26	78.5	Unknown	B-actin	Control
A06	FAM	15.16	79	Unknown	B-actin	Control
A07	FAM	15.18	81	Unknown	B-actin	Control
A08	FAM	15.25	80.5	Unknown	B-actin	Control
A09	FAM	15.15	81.5	Unknown	B-actin	Control
A10	FAM	15.3	82	Unknown	B-actin	HG
A11	FAM	15.24	78.5	Unknown	B-actin	HG
A12	FAM	15.28	79	Unknown	B-actin	HG
B01	FAM	15.2	79.5	Unknown	B-actin	HG
B02	FAM	15.17	81.5	Unknown	B-actin	HG
B03	FAM	15.33	80	Unknown	B-actin	HG
B04	FAM	15.34	78	Unknown	B-actin	HG
B05	FAM	15.41	79	Unknown	B-actin	HG
B06	FAM	15.23	82	Unknown	B-actin	HG
B07	FAM	15.43	78.5	Unknown	B-actin	HG+MCC950
B08	FAM	15.5	81.5	Unknown	B-actin	HG+MCC950
B09	FAM	15.5	80	Unknown	B-actin	HG+MCC950
B10	FAM	15.5	80.5	Unknown	B-actin	HG+MCC950
B11	FAM	15.59	79	Unknown	B-actin	HG+MCC950
B12	FAM	15.54	82	Unknown	B-actin	HG+MCC950
C01	FAM	15.61	79	Unknown	B-actin	HG+MCC950
C02	FAM	15.69	78.5	Unknown	B-actin	HG+MCC950
C03	FAM	15.53	81	Unknown	B-actin	HG+MCC950
C04	FAM	15.76	78	Unknown	B-actin	HG+Ac-YVAD-CMK
C05	FAM	15.77	82	Unknown	B-actin	HG+Ac-YVAD-CMK
C06	FAM	15.85	79.5	Unknown	B-actin	HG+Ac-YVAD-CMK
C07	FAM	15.72	80	Unknown	B-actin	HG+Ac-YVAD-CMK
C08	FAM	15.77	81.5	Unknown	B-actin	HG+Ac-YVAD-CMK
C09	FAM	15.7	80.5	Unknown	B-actin	HG+Ac-YVAD-CMK
C10	FAM	15.6	81	Unknown	B-actin	HG+Ac-YVAD-CMK
C11	FAM	15.61	82	Unknown	B-actin	HG+Ac-YVAD-CMK
C12	FAM	15.76	79.5	Unknown	B-actin	HG+Ac-YVAD-CMK
D01	FAM	29.31	78	Unknown	α-SMA	Control
D02	FAM	29.24	78.5	Unknown	α-SMA	Control
D03	FAM	29.14	81.5	Unknown	α-SMA	Control
D04	FAM	29.56	78.5	Unknown	α-SMA	Control
D05	FAM	29.5	79.5	Unknown	α-SMA	Control
D06	FAM	29.38	79	Unknown	α-SMA	Control
D07	FAM	29.4	79.5	Unknown	α-SMA	Control
D08	FAM	29.52	82	Unknown	α-SMA	Control
D09	FAM	29.44	81.5	Unknown	α-SMA	Control
D10	FAM	27.95	80.5	Unknown	α-SMA	HG
D11	FAM	27.89	81	Unknown	α-SMA	HG
D12	FAM	27.94	78	Unknown	α-SMA	HG
E01	FAM	27.62	82	Unknown	α-SMA	HG
E02	FAM	27.76	81	Unknown	α-SMA	HG
E03	FAM	27.78	81.5	Unknown	α-SMA	HG
E04	FAM	27.81	79.5	Unknown	α-SMA	HG
E05	FAM	27.92	78.5	Unknown	α-SMA	HG
E06	FAM	28	81.5	Unknown	α-SMA	HG
E07	FAM	29.02	79	Unknown	α-SMA	HG+MCC950
E08	FAM	29.11	79.5	Unknown	α-SMA	HG+MCC950
E09	FAM	29.06	80.5	Unknown	α-SMA	HG+MCC950
E10	FAM	29.22	78.5	Unknown	α-SMA	HG+MCC950
E11	FAM	29.13	79.5	Unknown	α-SMA	HG+MCC950
E12	FAM	29.22	79	Unknown	α-SMA	HG+MCC950
F01	FAM	29.05	80.5	Unknown	α-SMA	HG+MCC950
F02	FAM	29.09	81.5	Unknown	α-SMA	HG+MCC950
F03	FAM	28.93	82	Unknown	α-SMA	HG+MCC950
F04	FAM	29.36	78	Unknown	α-SMA	HG+Ac-YVAD-CMK
F05	FAM	29.29	79.5	Unknown	α-SMA	HG+Ac-YVAD-CMK
F06	FAM	29.25	81.5	Unknown	α-SMA	HG+Ac-YVAD-CMK
F07	FAM	29.53	80	Unknown	α-SMA	HG+Ac-YVAD-CMK
F08	FAM	29.5	82	Unknown	α-SMA	HG+Ac-YVAD-CMK
F09	FAM	29.54	79	Unknown	α-SMA	HG+Ac-YVAD-CMK
F10	FAM	29.33	80.5	Unknown	α-SMA	HG+Ac-YVAD-CMK
F11	FAM	29.17	82	Unknown	α-SMA	HG+Ac-YVAD-CMK
F12	FAM	29.19	81	Unknown	α-SMA	HG+Ac-YVAD-CMK
G01	FAM	28.73	78.5	Unknown	synaptopodin	Control
G02	FAM	28.59	79.5	Unknown	synaptopodin	Control
G03	FAM	28.7	80	Unknown	synaptopodin	Control
G04	FAM	28.75	81.5	Unknown	synaptopodin	Control
G05	FAM	28.63	78	Unknown	synaptopodin	Control
G06	FAM	28.79	80.5	Unknown	synaptopodin	Control
G07	FAM	28.57	78	Unknown	synaptopodin	Control
G08	FAM	28.49	80	Unknown	synaptopodin	Control
G09	FAM	28.61	80.5	Unknown	synaptopodin	Control
G10	FAM	29.58	81.5	Unknown	synaptopodin	HG
G11	FAM	29.6	82	Unknown	synaptopodin	HG
G12	FAM	29.61	81	Unknown	synaptopodin	HG
H01	FAM	29.85	78.5	Unknown	synaptopodin	HG
H02	FAM	29.72	79	Unknown	synaptopodin	HG
H03	FAM	29.74	79.5	Unknown	synaptopodin	HG
H04	FAM	29.72	80	Unknown	synaptopodin	HG
H05	FAM	29.57	81.5	Unknown	synaptopodin	HG
H06	FAM	29.58	81	Unknown	synaptopodin	HG
H07	FAM	29.29	79.5	Unknown	synaptopodin	HG+MCC950
H08	FAM	29.24	82	Unknown	synaptopodin	HG+MCC950
H09	FAM	29.22	81.5	Unknown	synaptopodin	HG+MCC950
H10	FAM	29.42	79.5	Unknown	synaptopodin	HG+MCC950
H11	FAM	29.33	80.5	Unknown	synaptopodin	HG+MCC950
H12	FAM	29.33	78	Unknown	synaptopodin	HG+MCC950

## Sheet: fig5B-2
Area	Aisle	CT	TM	Type	Gene	The sample name
A01	FAM	29.58	81.5	Unknown	synaptopodin	HG+MCC950
A02	FAM	29.67	78.5	Unknown	synaptopodin	HG+MCC950
A03	FAM	29.53	79.5	Unknown	synaptopodin	HG+MCC950
A04	FAM	29.7	80	Unknown	synaptopodin	HG+Ac-YVAD-CMK
A05	FAM	29.63	81.5	Unknown	synaptopodin	HG+Ac-YVAD-CMK
A06	FAM	29.72	79.5	Unknown	synaptopodin	HG+Ac-YVAD-CMK
A07	FAM	29.4	79	Unknown	synaptopodin	HG+Ac-YVAD-CMK
A08	FAM	29.46	80.5	Unknown	synaptopodin	HG+Ac-YVAD-CMK
A09	FAM	29.43	82	Unknown	synaptopodin	HG+Ac-YVAD-CMK
A10	FAM	29.35	81	Unknown	synaptopodin	HG+Ac-YVAD-CMK
A11	FAM	29.3	81.5	Unknown	synaptopodin	HG+Ac-YVAD-CMK
A12	FAM	29.46	79.5	Unknown	synaptopodin	HG+Ac-YVAD-CMK

## Sheet: a-SMA
	B-actin	α-SMA	CT2-CT1		∆CT-control-∆CT	2-∆∆CT		2-∆∆CT/control-2-∆∆CT	mean
	CT1	CT2	∆CT	control-∆CT	∆∆CT	2-∆∆CT	control-2-∆∆CT	control-2-∆∆CT
Control	15.13	29.23	14.1	14.1967	-0.0966667	1.0693	1.00117	1.06805
	15.25	29.48	14.23	14.1967	0.0333333	0.97716	1.00117	0.976018
	15.19	29.45	14.26	14.1967	0.0633333	0.95705	1.00117	0.955932	1	0.0597829
			14.1967			1.00117
HG	15.28	27.93	12.65	14.1967	-1.54667	2.92141	1.00117	2.918
	15.24	27.72	12.48	14.1967	-1.71667	3.28676	1.00117	3.28292
	15.33	27.91	12.58	14.1967	-1.61667	3.06666	1.00117	3.06307	3.088	0.183733
HG+MCC950	15.48	29.06	13.58	14.1967	-0.616667	1.53333	1.00117	1.53154
	15.55	29.19	13.64	14.1967	-0.556667	1.47087	1.00117	1.46915
	15.61	29.02	13.41	14.1967	-0.786667	1.72508	1.00117	1.72307	1.57458	0.13232
HG+Ac-YVAD-CMK	15.79	29.3	13.51	14.1967	-0.686667	1.60956	1.00117	1.60768
	15.73	29.52	13.79	14.1967	-0.406667	1.32562	1.00117	1.32407
	15.66	29.23	13.57	14.1967	-0.626667	1.54399	1.00117	1.54219	1.49131	0.148492
Group
Control	3	1±0.06
HG	3	3.09±0.18
HG+MCC950	3	1.57±0.13
HG+Ac-YVAD-CMK	3	1.5±0.15

## Sheet: synaptopodin
	B-actin	synaptopodin	CT2-CT1		∆CT-control-∆CT	2-∆∆CT		2-∆∆CT/control-2-∆∆CT	Mean
	CT1	CT2	∆CT	control-∆CT	∆∆CT	2-∆∆CT	control-2-∆∆CT	control--∆∆CT
Control	15.13	28.67	13.54	13.46	0.08	0.946058	1.00117	0.944949
	15.25	28.72	13.47	13.46	0.01	0.993092	1.00117	0.991929
	15.19	28.56	13.37	13.46	-0.09	1.06437	1.00117	1.06312	1	0.059499
			13.46			1.00117
HG	15.28	29.59	14.31	13.46	0.85	0.554785	1.00117	0.554134
	15.24	29.77	14.53	13.46	1.07	0.476319	1.00117	0.475761
	15.33	29.62	14.29	13.46	0.83	0.562529	1.00117	0.56187	0.530588	0.0476394
HG+MCC950	15.48	29.25	13.77	13.46	0.31	0.806642	1.00117	0.805696
	15.55	29.36	13.81	13.46	0.35	0.784584	1.00117	0.783665
	15.61	29.59	13.98	13.46	0.52	0.697372	1.00117	0.696554	0.761972	0.0577141
HG+Ac-YVAD-CMK	15.79	29.68	13.89	13.46	0.43	0.742262	1.00117	0.741392
	15.73	29.43	13.7	13.46	0.24	0.846745	1.00117	0.845753
	15.66	29.37	13.71	13.46	0.25	0.840896	1.00117	0.839911	0.809019	0.0586392
Group
Control	3	1±0.06
HG	3	0.53±0.05
HG+MCC950	3	0.76±0.06
HG+Ac-YVAD-CMK	3	0.81±0.06

## Sheet: fig5C
Area	Aisle	CT	TM	Type	Gene	The sample name
A01	FAM	13.62	80	Unknown	B-actin	Vehicle
A02	FAM	13.68	81.5	Unknown	B-actin	Vehicle
A03	FAM	13.77	80.5	Unknown	B-actin	Vehicle
A04	FAM	13.84	81	Unknown	B-actin	Vehicle
A05	FAM	13.72	82	Unknown	B-actin	Vehicle
A06	FAM	13.88	79.5	Unknown	B-actin	Vehicle
A07	FAM	13.81	78	Unknown	B-actin	Vehicle
A08	FAM	13.75	78.5	Unknown	B-actin	Vehicle
A09	FAM	13.69	81.5	Unknown	B-actin	Vehicle
A10	FAM	13.56	78.5	Unknown	B-actin	Nigericin
A11	FAM	13.59	79.5	Unknown	B-actin	Nigericin
A12	FAM	13.6	80.5	Unknown	B-actin	Nigericin
B01	FAM	13.56	78.5	Unknown	B-actin	Nigericin
B02	FAM	13.57	79	Unknown	B-actin	Nigericin
B03	FAM	13.43	81	Unknown	B-actin	Nigericin
B04	FAM	13.74	80.5	Unknown	B-actin	Nigericin
B05	FAM	13.67	81.5	Unknown	B-actin	Nigericin
B06	FAM	13.56	82	Unknown	B-actin	Nigericin
B07	FAM	27.46	78.5	Unknown	α-SMA	Vehicle
B08	FAM	27.32	79	Unknown	α-SMA	Vehicle
B09	FAM	27.39	79.5	Unknown	α-SMA	Vehicle
B10	FAM	27.24	79	Unknown	α-SMA	Vehicle
B11	FAM	27.42	81	Unknown	α-SMA	Vehicle
B12	FAM	27.33	80.5	Unknown	α-SMA	Vehicle
C01	FAM	27.34	81.5	Unknown	α-SMA	Vehicle
C02	FAM	27.45	82	Unknown	α-SMA	Vehicle
C03	FAM	27.37	78.5	Unknown	α-SMA	Vehicle
C04	FAM	25.99	79	Unknown	α-SMA	Nigericin
C05	FAM	25.95	79.5	Unknown	α-SMA	Nigericin
C06	FAM	25.95	81.5	Unknown	α-SMA	Nigericin
C07	FAM	25.98	80	Unknown	α-SMA	Nigericin
C08	FAM	26.13	78	Unknown	α-SMA	Nigericin
C09	FAM	26.07	79	Unknown	α-SMA	Nigericin
C10	FAM	25.95	82	Unknown	α-SMA	Nigericin
C11	FAM	26.12	78.5	Unknown	α-SMA	Nigericin
C12	FAM	26.07	81.5	Unknown	α-SMA	Nigericin
D01	FAM	28.17	80	Unknown	synaptopodin	Vehicle
D02	FAM	28.24	80	Unknown	synaptopodin	Vehicle
D03	FAM	28.15	79.5	Unknown	synaptopodin	Vehicle
D04	FAM	28.2	78	Unknown	synaptopodin	Vehicle
D05	FAM	28.28	82	Unknown	synaptopodin	Vehicle
D06	FAM	28.2	81.5	Unknown	synaptopodin	Vehicle
D07	FAM	28.28	80.5	Unknown	synaptopodin	Vehicle
D08	FAM	28.44	78	Unknown	synaptopodin	Vehicle
D09	FAM	28.3	79.5	Unknown	synaptopodin	Vehicle
D10	FAM	28.42	79	Unknown	synaptopodin	Nigericin
D11	FAM	28.4	80.5	Unknown	synaptopodin	Nigericin
D12	FAM	28.46	82	Unknown	synaptopodin	Nigericin
E01	FAM	28.42	81	Unknown	synaptopodin	Nigericin
E02	FAM	28.45	81.5	Unknown	synaptopodin	Nigericin
E03	FAM	28.37	79.5	Unknown	synaptopodin	Nigericin
E04	FAM	28.7	82	Unknown	synaptopodin	Nigericin
E05	FAM	28.84	78.5	Unknown	synaptopodin	Nigericin
E06	FAM	28.72	80.5	Unknown	synaptopodin	Nigericin

## Sheet: a-SMA.
	B-actin	α-SMA	CT2-CT1		∆CT-control-∆CT	2-∆∆CT		2-∆∆CT/control-2-∆∆CT	mean
	CT1	CT2	∆CT	control-∆CT	∆∆CT	2-∆∆CT	control-2-∆∆CT	control-2-∆∆CT
Vehicle	13.69	27.39	13.7	13.62	0.08	0.946058	1.00135	0.944778
	13.81	27.33	13.52	13.62	-0.1	1.07177	1.00135	1.07032
	13.75	27.39	13.64	13.62	0.02	0.986233	1.00135	0.984899	1	0.0641208
			13.62			1.00135
Nigericin	13.58	25.96	12.38	13.62	-1.24	2.36199	1.00135	2.35879
	13.52	26.06	12.54	13.62	-1.08	2.11404	1.00135	2.11118
	13.66	26.05	12.39	13.62	-1.23	2.34567	1.00135	2.3425	2.27082	0.138496
Group
Vehicle	3	1±0.06
Nigericin	3	2.27±0.14

## Sheet: synaptopodin.
	B-actin	synaptopodin	CT2-CT1		∆CT-control-∆CT	2-∆∆CT		2-∆∆CT/control-2-∆∆CT	mean
	CT1	CT2	∆CT	control-∆CT	∆∆CT	2-∆∆CT	control-2-∆∆CT	control-2-∆∆CT
Vehicle	13.69	28.19	14.5	14.5033	-0.00333333	1.00231	1.00116	1.00115
	13.81	28.23	14.42	14.5033	-0.0833333	1.05946	1.00116	1.05824
	13.75	28.34	14.59	14.5033	0.0866667	0.941696	1.00116	0.940607	1	0.058824
			14.5033			1.00116
Nigericin	13.58	28.43	14.85	14.5033	0.346667	0.786399	1.00116	0.78549
	13.52	28.41	14.89	14.5033	0.386667	0.764895	1.00116	0.764011
	13.66	28.75	15.09	14.5033	0.586667	0.66588	1.00116	0.66511	0.738203	0.0642055
Group
Vehicle	3	1±0.06
Nigericin	3	0.74±0.06

## Sheet: fig5E-1
	Vehicle	Nigericin
α-SMA	0.31	0.63
	0.29	0.61
	0.28	0.61
Synaptopodin	0.27	0.15
	0.28	0.16
	0.3	0.14
β-actin	0.76	0.78
	0.79	0.75
	0.77	0.74
α-SMA/β-actin ratio	0.407895	0.807692
	0.367089	0.813333
	0.363636	0.824324
Synap/β-actin ratio	0.355263	0.192308
	0.35443	0.213333
	0.38961	0.189189
