# Supplementary material for: Breviscapine alleviates podocyte injury by inhibiting NF-κB/NLRP3-mediated pyroptosis in diabetic nephropathy
Source: PeerJ. 2023 Feb 13;11:e14826. doi: 10.7717/peerj.14826 (PMC9933739; doi:10.7717/peerj.14826)
Supplement: Supplemental Information 9 [file peerj-11-14826-s009.xlsx]

## Sheet: fig6D-1
Area	Aisle	CT	TM	Type	Gene	The sample name
A01	FAM	13.26	81	Unknown	B-actin	Control
A02	FAM	13.16	82	Unknown	B-actin	Control
A03	FAM	13.14	79	Unknown	B-actin	Control
A04	FAM	13.37	78.5	Unknown	B-actin	Control
A05	FAM	13.19	79.5	Unknown	B-actin	Control
A06	FAM	13.3	82	Unknown	B-actin	Control
A07	FAM	13.17	81	Unknown	B-actin	Control
A08	FAM	13.21	81.5	Unknown	B-actin	Control
A09	FAM	13.29	79.5	Unknown	B-actin	Control
A10	FAM	13.36	78.5	Unknown	B-actin	Control
A11	FAM	13.3	81.5	Unknown	B-actin	Control
A12	FAM	13.29	78	Unknown	B-actin	Control
B01	FAM	13.22	78.5	Unknown	B-actin	Control
B02	FAM	13.09	79.5	Unknown	B-actin	Control
B03	FAM	13.07	81	Unknown	B-actin	Control
B04	FAM	13.42	82	Unknown	B-actin	Control
B05	FAM	13.28	78.5	Unknown	B-actin	Control
B06	FAM	13.45	79.5	Unknown	B-actin	Control
B07	FAM	13.49	81	Unknown	B-actin	Control
B08	FAM	13.45	81.5	Unknown	B-actin	Control
B09	FAM	13.37	78.5	Unknown	B-actin	Control
B10	FAM	13.52	79	Unknown	B-actin	DN
B11	FAM	13.45	81.5	Unknown	B-actin	DN
B12	FAM	13.4	81	Unknown	B-actin	DN
C01	FAM	13.49	78.5	Unknown	B-actin	DN
C02	FAM	13.44	79	Unknown	B-actin	DN
C03	FAM	13.61	81	Unknown	B-actin	DN
C04	FAM	13.56	79	Unknown	B-actin	DN
C05	FAM	13.61	79.5	Unknown	B-actin	DN
C06	FAM	13.58	78.5	Unknown	B-actin	DN
C07	FAM	13.6	79	Unknown	B-actin	DN
C08	FAM	13.65	81	Unknown	B-actin	DN
C09	FAM	13.68	79.5	Unknown	B-actin	DN
C10	FAM	13.77	81.5	Unknown	B-actin	DN
C11	FAM	13.61	82	Unknown	B-actin	DN
C12	FAM	13.68	78.5	Unknown	B-actin	DN
D01	FAM	13.75	81	Unknown	B-actin	DN
D02	FAM	13.81	78.5	Unknown	B-actin	DN
D03	FAM	13.64	79.5	Unknown	B-actin	DN
D04	FAM	13.73	78	Unknown	B-actin	DN
D05	FAM	13.8	80.5	Unknown	B-actin	DN
D06	FAM	13.81	79	Unknown	B-actin	DN
D07	FAM	13.03	78.5	Unknown	B-actin	DN+Bre (30mg/kg)
D08	FAM	13.05	82	Unknown	B-actin	DN+Bre (30mg/kg)
D09	FAM	13.08	81.5	Unknown	B-actin	DN+Bre (30mg/kg)
D10	FAM	13.02	80.5	Unknown	B-actin	DN+Bre (30mg/kg)
D11	FAM	13.15	79	Unknown	B-actin	DN+Bre (30mg/kg)
D12	FAM	13.18	78.5	Unknown	B-actin	DN+Bre (30mg/kg)
E01	FAM	13.22	79.5	Unknown	B-actin	DN+Bre (30mg/kg)
E02	FAM	13.25	81	Unknown	B-actin	DN+Bre (30mg/kg)
E03	FAM	13.08	78.5	Unknown	B-actin	DN+Bre (30mg/kg)
E04	FAM	13.3	81.5	Unknown	B-actin	DN+Bre (30mg/kg)
E05	FAM	13.19	79	Unknown	B-actin	DN+Bre (30mg/kg)
E06	FAM	13.21	82	Unknown	B-actin	DN+Bre (30mg/kg)
E07	FAM	13.32	81.5	Unknown	B-actin	DN+Bre (30mg/kg)
E08	FAM	13.21	79.5	Unknown	B-actin	DN+Bre (30mg/kg)
E09	FAM	13.29	78	Unknown	B-actin	DN+Bre (30mg/kg)
E10	FAM	13.41	80.5	Unknown	B-actin	DN+Bre (30mg/kg)
E11	FAM	13.33	79	Unknown	B-actin	DN+Bre (30mg/kg)
E12	FAM	13.24	81.5	Unknown	B-actin	DN+Bre (30mg/kg)
F01	FAM	13.35	80.5	Unknown	B-actin	DN+Bre (30mg/kg)
F02	FAM	13.41	80	Unknown	B-actin	DN+Bre (30mg/kg)
F03	FAM	13.38	78	Unknown	B-actin	DN+Bre (30mg/kg)
F04	FAM	27.26	82	Unknown	IL-1β	Control
F05	FAM	27.37	79.5	Unknown	IL-1β	Control
F06	FAM	27.22	80.5	Unknown	IL-1β	Control
F07	FAM	27.69	80	Unknown	IL-1β	Control
F08	FAM	27.61	80	Unknown	IL-1β	Control
F09	FAM	27.52	80.5	Unknown	IL-1β	Control
F10	FAM	27.42	79.5	Unknown	IL-1β	Control
F11	FAM	27.51	81	Unknown	IL-1β	Control
F12	FAM	27.4	81.5	Unknown	IL-1β	Control
G01	FAM	27.42	80.5	Unknown	IL-1β	Control
G02	FAM	27.4	79	Unknown	IL-1β	Control
G03	FAM	27.39	79.5	Unknown	IL-1β	Control
G04	FAM	27.09	80	Unknown	IL-1β	Control
G05	FAM	27.18	78	Unknown	IL-1β	Control
G06	FAM	27.25	81	Unknown	IL-1β	Control
G07	FAM	27.54	79.5	Unknown	IL-1β	Control
G08	FAM	27.39	80	Unknown	IL-1β	Control
G09	FAM	27.43	78.5	Unknown	IL-1β	Control
G10	FAM	27.78	79	Unknown	IL-1β	Control
G11	FAM	27.65	81.5	Unknown	IL-1β	Control
G12	FAM	27.75	82	Unknown	IL-1β	Control
H01	FAM	25.85	79.5	Unknown	IL-1β	DN
H02	FAM	25.91	78	Unknown	IL-1β	DN
H03	FAM	26	81	Unknown	IL-1β	DN
H04	FAM	26.06	80.5	Unknown	IL-1β	DN
H05	FAM	26.16	81.5	Unknown	IL-1β	DN
H06	FAM	25.99	82	Unknown	IL-1β	DN
H07	FAM	25.89	78	Unknown	IL-1β	DN
H08	FAM	26.01	79.5	Unknown	IL-1β	DN
H09	FAM	25.95	79	Unknown	IL-1β	DN
H10	FAM	26.09	81.5	Unknown	IL-1β	DN
H11	FAM	26.1	80.5	Unknown	IL-1β	DN
H12	FAM	26.05	80	Unknown	IL-1β	DN

## Sheet: fig6D-2
Area	Aisle	CT	TM	Type	Gene	The sample name
A01	FAM	26.35	79	Unknown	IL-1β	DN
A02	FAM	26.3	79.5	Unknown	IL-1β	DN
A03	FAM	26.2	81	Unknown	IL-1β	DN
A04	FAM	26.32	82	Unknown	IL-1β	DN
A05	FAM	26.15	78.5	Unknown	IL-1β	DN
A06	FAM	26.24	79	Unknown	IL-1β	DN
A07	FAM	26.45	79.5	Unknown	IL-1β	DN
A08	FAM	26.33	81.5	Unknown	IL-1β	DN
A09	FAM	26.41	78.5	Unknown	IL-1β	DN
A10	FAM	26.33	78	Unknown	IL-1β	DN+Bre (30mg/kg)
A11	FAM	26.49	81.5	Unknown	IL-1β	DN+Bre (30mg/kg)
A12	FAM	26.45	79.5	Unknown	IL-1β	DN+Bre (30mg/kg)
B01	FAM	26.44	79	Unknown	IL-1β	DN+Bre (30mg/kg)
B02	FAM	26.58	81.5	Unknown	IL-1β	DN+Bre (30mg/kg)
B03	FAM	26.55	78.5	Unknown	IL-1β	DN+Bre (30mg/kg)
B04	FAM	26.36	79	Unknown	IL-1β	DN+Bre (30mg/kg)
B05	FAM	26.45	81	Unknown	IL-1β	DN+Bre (30mg/kg)
B06	FAM	26.47	81.5	Unknown	IL-1β	DN+Bre (30mg/kg)
B07	FAM	26.8	78.5	Unknown	IL-1β	DN+Bre (30mg/kg)
B08	FAM	26.78	80	Unknown	IL-1β	DN+Bre (30mg/kg)
B09	FAM	26.77	81.5	Unknown	IL-1β	DN+Bre (30mg/kg)
B10	FAM	26.51	79.5	Unknown	IL-1β	DN+Bre (30mg/kg)
B11	FAM	26.6	82	Unknown	IL-1β	DN+Bre (30mg/kg)
B12	FAM	26.43	81.5	Unknown	IL-1β	DN+Bre (30mg/kg)
C01	FAM	26.4	80	Unknown	IL-1β	DN+Bre (30mg/kg)
C02	FAM	26.43	78.5	Unknown	IL-1β	DN+Bre (30mg/kg)
C03	FAM	26.57	79	Unknown	IL-1β	DN+Bre (30mg/kg)
C04	FAM	26.69	79.5	Unknown	IL-1β	DN+Bre (30mg/kg)
C05	FAM	26.71	81.5	Unknown	IL-1β	DN+Bre (30mg/kg)
C06	FAM	26.61	80	Unknown	IL-1β	DN+Bre (30mg/kg)
C07	FAM	28.48	78.5	Unknown	IL-18	Control
C08	FAM	28.61	81.5	Unknown	IL-18	Control
C09	FAM	28.51	80	Unknown	IL-18	Control
C10	FAM	28.48	79	Unknown	IL-18	Control
C11	FAM	28.52	80.5	Unknown	IL-18	Control
C12	FAM	28.63	82	Unknown	IL-18	Control
D01	FAM	28.28	78	Unknown	IL-18	Control
D02	FAM	28.34	79.5	Unknown	IL-18	Control
D03	FAM	28.23	81	Unknown	IL-18	Control
D04	FAM	28.49	80.5	Unknown	IL-18	Control
D05	FAM	28.51	79	Unknown	IL-18	Control
D06	FAM	28.45	78.5	Unknown	IL-18	Control
D07	FAM	28.3	79	Unknown	IL-18	Control
D08	FAM	28.39	79.5	Unknown	IL-18	Control
D09	FAM	28.46	79	Unknown	IL-18	Control
D10	FAM	28.49	81.5	Unknown	IL-18	Control
D11	FAM	28.32	82	Unknown	IL-18	Control
D12	FAM	28.45	79.5	Unknown	IL-18	Control
E01	FAM	28.55	81	Unknown	IL-18	Control
E02	FAM	28.64	78.5	Unknown	IL-18	Control
E03	FAM	28.64	79	Unknown	IL-18	Control
E04	FAM	27.05	81.5	Unknown	IL-18	DN
E05	FAM	27.19	78.5	Unknown	IL-18	DN
E06	FAM	27.09	79.5	Unknown	IL-18	DN
E07	FAM	27.08	81.5	Unknown	IL-18	DN
E08	FAM	27.2	81	Unknown	IL-18	DN
E09	FAM	27.06	78.5	Unknown	IL-18	DN
E10	FAM	27.46	82	Unknown	IL-18	DN
E11	FAM	27.37	78.5	Unknown	IL-18	DN
E12	FAM	27.39	81.5	Unknown	IL-18	DN
F01	FAM	27.3	78	Unknown	IL-18	DN
F02	FAM	27.34	78.5	Unknown	IL-18	DN
F03	FAM	27.33	80	Unknown	IL-18	DN
F04	FAM	27.18	79.5	Unknown	IL-18	DN
F05	FAM	27.26	82	Unknown	IL-18	DN
F06	FAM	27.12	81.5	Unknown	IL-18	DN
F07	FAM	27.49	79	Unknown	IL-18	DN
F08	FAM	27.44	80.5	Unknown	IL-18	DN
F09	FAM	27.31	79.5	Unknown	IL-18	DN
F10	FAM	27.57	82	Unknown	IL-18	DN
F11	FAM	27.47	78.5	Unknown	IL-18	DN
F12	FAM	27.54	81	Unknown	IL-18	DN
G01	FAM	27.8	80.5	Unknown	IL-18	DN+Bre (30mg/kg)
G02	FAM	27.66	79.5	Unknown	IL-18	DN+Bre (30mg/kg)
G03	FAM	27.8	82	Unknown	IL-18	DN+Bre (30mg/kg)
G04	FAM	27.47	81	Unknown	IL-18	DN+Bre (30mg/kg)
G05	FAM	27.46	79.5	Unknown	IL-18	DN+Bre (30mg/kg)
G06	FAM	27.33	81	Unknown	IL-18	DN+Bre (30mg/kg)
G07	FAM	27.45	82	Unknown	IL-18	DN+Bre (30mg/kg)
G08	FAM	27.55	81.5	Unknown	IL-18	DN+Bre (30mg/kg)
G09	FAM	27.56	79	Unknown	IL-18	DN+Bre (30mg/kg)
G10	FAM	27.76	78.5	Unknown	IL-18	DN+Bre (30mg/kg)
G11	FAM	27.79	81.5	Unknown	IL-18	DN+Bre (30mg/kg)
G12	FAM	27.8	80	Unknown	IL-18	DN+Bre (30mg/kg)
H01	FAM	27.74	80.5	Unknown	IL-18	DN+Bre (30mg/kg)
H02	FAM	27.72	79.5	Unknown	IL-18	DN+Bre (30mg/kg)
H03	FAM	27.87	81	Unknown	IL-18	DN+Bre (30mg/kg)
H04	FAM	27.89	78	Unknown	IL-18	DN+Bre (30mg/kg)
H05	FAM	27.84	79.5	Unknown	IL-18	DN+Bre (30mg/kg)
H06	FAM	28.01	81	Unknown	IL-18	DN+Bre (30mg/kg)
H07	FAM	27.93	80.5	Unknown	IL-18	DN+Bre (30mg/kg)
H08	FAM	27.85	78.5	Unknown	IL-18	DN+Bre (30mg/kg)
H09	FAM	27.82	78	Unknown	IL-18	DN+Bre (30mg/kg)
H10	FAM	26.79	80	Unknown	TNF-α	Control
H11	FAM	26.86	80.5	Unknown	TNF-α	Control
H12	FAM	26.96	78.5	Unknown	TNF-α	Control

## Sheet: fig6D-3
Area	Aisle	CT	TM	Type	Gene	The sample name
A01	FAM	27	82	Unknown	TNF-α	Control
A02	FAM	26.94	80.5	Unknown	TNF-α	Control
A03	FAM	26.86	79	Unknown	TNF-α	Control
A04	FAM	26.84	79.5	Unknown	TNF-α	Control
A05	FAM	26.9	81	Unknown	TNF-α	Control
A06	FAM	26.8	78	Unknown	TNF-α	Control
A07	FAM	26.9	78.5	Unknown	TNF-α	Control
A08	FAM	26.95	79.5	Unknown	TNF-α	Control
A09	FAM	26.95	79	Unknown	TNF-α	Control
A10	FAM	26.87	82	Unknown	TNF-α	Control
A11	FAM	26.73	81.5	Unknown	TNF-α	Control
A12	FAM	26.88	80.5	Unknown	TNF-α	Control
B01	FAM	27.3	80	Unknown	TNF-α	Control
B02	FAM	27.45	81	Unknown	TNF-α	Control
B03	FAM	27.31	79.5	Unknown	TNF-α	Control
B04	FAM	27.26	78	Unknown	TNF-α	Control
B05	FAM	27.15	78.5	Unknown	TNF-α	Control
B06	FAM	27.17	81.5	Unknown	TNF-α	Control
B07	FAM	25.71	80.5	Unknown	TNF-α	DN
B08	FAM	25.72	79	Unknown	TNF-α	DN
B09	FAM	25.86	81	Unknown	TNF-α	DN
B10	FAM	25.82	79	Unknown	TNF-α	DN
B11	FAM	25.68	78.5	Unknown	TNF-α	DN
B12	FAM	25.67	81	Unknown	TNF-α	DN
C01	FAM	25.93	80	Unknown	TNF-α	DN
C02	FAM	25.97	82	Unknown	TNF-α	DN
C03	FAM	25.86	78.5	Unknown	TNF-α	DN
C04	FAM	25.85	80.5	Unknown	TNF-α	DN
C05	FAM	25.83	81	Unknown	TNF-α	DN
C06	FAM	25.78	81.5	Unknown	TNF-α	DN
C07	FAM	25.75	80.5	Unknown	TNF-α	DN
C08	FAM	25.8	78	Unknown	TNF-α	DN
C09	FAM	25.91	82	Unknown	TNF-α	DN
C10	FAM	25.84	78.5	Unknown	TNF-α	DN
C11	FAM	25.95	81	Unknown	TNF-α	DN
C12	FAM	25.8	79.5	Unknown	TNF-α	DN
D01	FAM	26.07	78	Unknown	TNF-α	DN
D02	FAM	26.07	78.5	Unknown	TNF-α	DN
D03	FAM	25.96	79	Unknown	TNF-α	DN
D04	FAM	25.91	82	Unknown	TNF-α	DN+Bre (30mg/kg)
D05	FAM	25.78	80	Unknown	TNF-α	DN+Bre (30mg/kg)
D06	FAM	25.76	81.5	Unknown	TNF-α	DN+Bre (30mg/kg)
D07	FAM	25.95	80.5	Unknown	TNF-α	DN+Bre (30mg/kg)
D08	FAM	25.79	79.5	Unknown	TNF-α	DN+Bre (30mg/kg)
D09	FAM	25.89	81	Unknown	TNF-α	DN+Bre (30mg/kg)
D10	FAM	26.23	82	Unknown	TNF-α	DN+Bre (30mg/kg)
D11	FAM	26.16	78	Unknown	TNF-α	DN+Bre (30mg/kg)
D12	FAM	26.1	78.5	Unknown	TNF-α	DN+Bre (30mg/kg)
E01	FAM	25.77	79.5	Unknown	TNF-α	DN+Bre (30mg/kg)
E02	FAM	25.74	81	Unknown	TNF-α	DN+Bre (30mg/kg)
E03	FAM	25.81	81	Unknown	TNF-α	DN+Bre (30mg/kg)
E04	FAM	26.13	78.5	Unknown	TNF-α	DN+Bre (30mg/kg)
E05	FAM	26.02	81	Unknown	TNF-α	DN+Bre (30mg/kg)
E06	FAM	26.02	79.5	Unknown	TNF-α	DN+Bre (30mg/kg)
E07	FAM	26.04	78	Unknown	TNF-α	DN+Bre (30mg/kg)
E08	FAM	26.16	78.5	Unknown	TNF-α	DN+Bre (30mg/kg)
E09	FAM	26.18	79	Unknown	TNF-α	DN+Bre (30mg/kg)
E10	FAM	26.18	82	Unknown	TNF-α	DN+Bre (30mg/kg)
E11	FAM	26.06	81	Unknown	TNF-α	DN+Bre (30mg/kg)
E12	FAM	26.13	80	Unknown	TNF-α	DN+Bre (30mg/kg)
F01	FAM	27.35	79.5	Unknown	IL-6	Control
F02	FAM	27.4	78	Unknown	IL-6	Control
F03	FAM	27.51	78.5	Unknown	IL-6	Control
F04	FAM	27.39	79	Unknown	IL-6	Control
F05	FAM	27.54	79.5	Unknown	IL-6	Control
F06	FAM	27.51	80.5	Unknown	IL-6	Control
F07	FAM	27.44	82	Unknown	IL-6	Control
F08	FAM	27.36	81	Unknown	IL-6	Control
F09	FAM	27.49	79.5	Unknown	IL-6	Control
F10	FAM	27.61	78.5	Unknown	IL-6	Control
F11	FAM	27.55	78	Unknown	IL-6	Control
F12	FAM	27.6	81.5	Unknown	IL-6	Control
G01	FAM	27.35	80	Unknown	IL-6	Control
G02	FAM	27.43	82	Unknown	IL-6	Control
G03	FAM	27.5	79.5	Unknown	IL-6	Control
G04	FAM	27.48	78	Unknown	IL-6	Control
G05	FAM	27.64	80.5	Unknown	IL-6	Control
G06	FAM	27.61	81	Unknown	IL-6	Control
G07	FAM	27.47	82	Unknown	IL-6	Control
G08	FAM	27.38	78.5	Unknown	IL-6	Control
G09	FAM	27.46	82	Unknown	IL-6	Control
G10	FAM	26.09	79	Unknown	IL-6	DN
G11	FAM	25.95	81	Unknown	IL-6	DN
G12	FAM	26.08	78.5	Unknown	IL-6	DN
H01	FAM	26.21	81	Unknown	IL-6	DN
H02	FAM	26.07	81	Unknown	IL-6	DN
H03	FAM	26.25	78.5	Unknown	IL-6	DN
H04	FAM	26.34	80.5	Unknown	IL-6	DN
H05	FAM	26.45	79.5	Unknown	IL-6	DN
H06	FAM	26.34	78	Unknown	IL-6	DN
H07	FAM	26.31	79	Unknown	IL-6	DN
H08	FAM	26.36	78.5	Unknown	IL-6	DN
H09	FAM	26.34	80	Unknown	IL-6	DN
H10	FAM	26.61	80.5	Unknown	IL-6	DN
H11	FAM	26.5	79.5	Unknown	IL-6	DN
H12	FAM	26.49	81	Unknown	IL-6	DN

## Sheet: fig6D-4
Area	Aisle	CT	TM	Type	Gene	The sample name
A01	FAM	26.42	80	Unknown	IL-6	DN
A02	FAM	26.27	78.5	Unknown	IL-6	DN
A03	FAM	26.3	79	Unknown	IL-6	DN
A04	FAM	26.65	79.5	Unknown	IL-6	DN
A05	FAM	26.55	78	Unknown	IL-6	DN
A06	FAM	26.54	82	Unknown	IL-6	DN
A07	FAM	26.13	81.5	Unknown	IL-6	DN+Bre (30mg/kg)
A08	FAM	26.23	80.5	Unknown	IL-6	DN+Bre (30mg/kg)
A09	FAM	26.08	79.5	Unknown	IL-6	DN+Bre (30mg/kg)
A10	FAM	26.18	78	Unknown	IL-6	DN+Bre (30mg/kg)
A11	FAM	26	78.5	Unknown	IL-6	DN+Bre (30mg/kg)
A12	FAM	26.07	79.5	Unknown	IL-6	DN+Bre (30mg/kg)
B01	FAM	25.99	81	Unknown	IL-6	DN+Bre (30mg/kg)
B02	FAM	25.98	80	Unknown	IL-6	DN+Bre (30mg/kg)
B03	FAM	26.09	82	Unknown	IL-6	DN+Bre (30mg/kg)
B04	FAM	26.39	80.5	Unknown	IL-6	DN+Bre (30mg/kg)
B05	FAM	26.38	81.5	Unknown	IL-6	DN+Bre (30mg/kg)
B06	FAM	26.35	78	Unknown	IL-6	DN+Bre (30mg/kg)
B07	FAM	26.21	79.5	Unknown	IL-6	DN+Bre (30mg/kg)
B08	FAM	26.19	79.5	Unknown	IL-6	DN+Bre (30mg/kg)
B09	FAM	26.33	78	Unknown	IL-6	DN+Bre (30mg/kg)
B10	FAM	26.34	78.5	Unknown	IL-6	DN+Bre (30mg/kg)
B11	FAM	26.35	81.5	Unknown	IL-6	DN+Bre (30mg/kg)
B12	FAM	26.5	80	Unknown	IL-6	DN+Bre (30mg/kg)
C01	FAM	26.4	80.5	Unknown	IL-6	DN+Bre (30mg/kg)
C02	FAM	26.49	81	Unknown	IL-6	DN+Bre (30mg/kg)
C03	FAM	26.41	82	Unknown	IL-6	DN+Bre (30mg/kg)

## Sheet: IL-1B
	B-actin	IL-1β	CT2-CT1		∆CT-control-∆CT	2-∆∆CT		2-∆∆CT/control-2-∆∆CT	mean
	CT1	CT2	∆CT	control-∆CT	∆∆CT	2-∆∆CT	control-2-∆∆CT	control-2-∆∆CT
Control	13.18	27.28	14.1	14.16	-0.06	1.04247	1.00255	1.03981
	13.29	27.61	14.32	14.16	0.16	0.895025	1.00255	0.892745
	13.23	27.44	14.21	14.16	0.05	0.965936	1.00255	0.963476
	13.32	27.4	14.08	14.16	-0.08	1.05702	1.00255	1.05433
	13.13	27.18	14.05	14.16	-0.11	1.07923	1.00255	1.07648
	13.38	27.45	14.07	14.16	-0.09	1.06437	1.00255	1.06166
	13.44	27.73	14.29	14.16	0.13	0.913831	1.00255	0.911504	1	0.0762192
			14.16			1.00255
DN	13.45	25.92	12.47	14.16	-1.69	3.22657	1.00255	3.21835
	13.51	26.07	12.56	14.16	-1.6	3.03143	1.00255	3.02371
	13.58	25.95	12.37	14.16	-1.79	3.45815	1.00255	3.44934
	13.64	26.08	12.44	14.16	-1.72	3.29436	1.00255	3.28597
	13.69	26.28	12.59	14.16	-1.57	2.96905	1.00255	2.96148
	13.73	26.24	12.51	14.16	-1.65	3.13834	1.00255	3.13034
	13.78	26.4	12.62	14.16	-1.54	2.90795	1.00255	2.90054	3.13853	0.194057
DN+Bre (30mg/kg)	13.05	26.43	13.38	14.16	-0.78	1.71713	1.00255	1.71276
	13.12	26.53	13.41	14.16	-0.75	1.68179	1.00255	1.67751
	13.18	26.43	13.25	14.16	-0.91	1.87905	1.00255	1.87426
	13.23	26.78	13.55	14.16	-0.61	1.52626	1.00255	1.52237
	13.28	26.51	13.23	14.16	-0.93	1.90528	1.00255	1.90042
	13.33	26.47	13.14	14.16	-1.02	2.02792	1.00255	2.02275
	13.38	26.67	13.29	14.16	-0.87	1.82766	1.00255	1.82301	1.79044	0.165731
Group
Control	7	1±0.08
DN	7	3.14±0.19
DN+Bre (30mg/kg)	7	1.79±0.17

## Sheet: IL-18
	B-actin	IL-18	CT2-CT1		∆CT-control-∆CT	2-∆∆CT		2-∆∆CT/control-2-∆∆CT	mean
	CT1	CT2	∆CT	control-∆CT	∆∆CT	2-∆∆CT	control-2-∆∆CT	control-2-∆∆CT
Control	13.18	28.53	15.35	15.1829	0.167143	0.890605	1.00265	0.888252
	13.29	28.54	15.25	15.1829	0.0671429	0.954526	1.00265	0.952005
	13.23	28.28	15.05	15.1829	-0.132857	1.09646	1.00265	1.09357
	13.32	28.48	15.16	15.1829	-0.0228571	1.01597	1.00265	1.01329
	13.13	28.39	15.26	15.1829	0.0771429	0.947933	1.00265	0.945429
	13.38	28.42	15.04	15.1829	-0.142857	1.10409	1.00265	1.10117
	13.44	28.61	15.17	15.1829	-0.0128571	1.00895	1.00265	1.00629	1	0.0785025
			15.1829			1.00265
DN	13.45	27.11	13.66	15.1829	-1.52286	2.8736	1.00265	2.86601
	13.51	27.11	13.6	15.1829	-1.58286	2.99563	1.00265	2.98771
	13.58	27.41	13.83	15.1829	-1.35286	2.55417	1.00265	2.54743
	13.64	27.32	13.68	15.1829	-1.50286	2.83403	1.00265	2.82655
	13.69	27.18	13.49	15.1829	-1.69286	3.23296	1.00265	3.22442
	13.73	27.42	13.69	15.1829	-1.49286	2.81446	1.00265	2.80702
	13.78	27.52	13.74	15.1829	-1.44286	2.71859	1.00265	2.71141	2.85294	0.213115
DN+Bre (30mg/kg)	13.05	27.75	14.7	15.1829	-0.482857	1.39751	1.00265	1.39382
	13.12	27.42	14.3	15.1829	-0.882857	1.84402	1.00265	1.83915
	13.18	27.52	14.34	15.1829	-0.842857	1.7936	1.00265	1.78886
	13.23	27.78	14.55	15.1829	-0.632857	1.55063	1.00265	1.54654
	13.28	27.78	14.5	15.1829	-0.682857	1.60532	1.00265	1.60108
	13.33	27.91	14.58	15.1829	-0.602857	1.51872	1.00265	1.51471
	13.38	27.87	14.49	15.1829	-0.692857	1.61648	1.00265	1.61221	1.61377	0.155097
Group
Control	7	1±0.08
DN	7	2.85±0.21
DN+Bre (30mg/kg)	7	1.61±0.16

## Sheet: TNF-a
	B-actin	TNF-α	CT2-CT1		∆CT-control-∆CT	2-∆∆CT		2-∆∆CT/control-2-∆∆CT	mean
	CT1	CT2	∆CT	control-∆CT	∆∆CT	2-∆∆CT	control-2-∆∆CT	control-2-∆∆CT
Control	13.18	26.87	13.69	13.7114	-0.0214286	1.01496	1.00307	1.01186
	13.29	26.93	13.64	13.7114	-0.0714286	1.05076	1.00307	1.04754
	13.23	26.85	13.62	13.7114	-0.0914286	1.06542	1.00307	1.06217
	13.32	26.93	13.61	13.7114	-0.101429	1.07284	1.00307	1.06956
	13.13	26.83	13.7	13.7114	-0.0114286	1.00795	1.00307	1.00487
	13.38	27.35	13.97	13.7114	0.258571	0.835915	1.00307	0.83336
	13.44	27.19	13.75	13.7114	0.0385714	0.973619	1.00307	0.970642	1	0.0814028
			13.7114			1.00307
DN	13.45	25.76	12.31	13.7114	-1.40143	2.64163	1.00307	2.63355
	13.51	25.73	12.22	13.7114	-1.49143	2.81167	1.00307	2.80308
	13.58	25.92	12.34	13.7114	-1.37143	2.58727	1.00307	2.57936
	13.64	25.82	12.18	13.7114	-1.53143	2.89072	1.00307	2.88188
	13.69	25.82	12.13	13.7114	-1.58143	2.99266	1.00307	2.98351
	13.73	25.86	12.13	13.7114	-1.58143	2.99266	1.00307	2.98351
	13.78	26.03	12.25	13.7114	-1.46143	2.75381	1.00307	2.74539	2.80147	0.159907
DN+Bre (30mg/kg)	13.05	25.81	12.76	13.7114	-0.951429	1.93379	1.00307	1.92787
	13.12	25.88	12.76	13.7114	-0.951429	1.93379	1.00307	1.92787
	13.18	26.16	12.98	13.7114	-0.731429	1.66028	1.00307	1.65521
	13.23	25.77	12.54	13.7114	-1.17143	2.25235	1.00307	2.24546
	13.28	26.06	12.78	13.7114	-0.931429	1.90716	1.00307	1.90133
	13.33	26.13	12.8	13.7114	-0.911429	1.88091	1.00307	1.87516
	13.38	26.12	12.74	13.7114	-0.971429	1.96078	1.00307	1.95479	1.92681	0.17292
Group
Control	7	1±0.08
DN	7	2.80±0.16
DN+Bre (30mg/kg)	7	1.93±0.17

## Sheet: TL-6
	B-actin	IL-6	CT2-CT1		∆CT-control-∆CT	2-∆∆CT		2-∆∆CT/control-2-∆∆CT	mean
	CT1	CT2	∆CT	control-∆CT	∆∆CT	2-∆∆CT	control-2-∆∆CT	control-2-∆∆CT
Control	13.18	27.42	14.24	14.2	0.04	0.972655	1.002	0.970716
	13.29	27.48	14.19	14.2	-0.01	1.00696	1.002	1.00495
	13.23	27.43	14.2	14.2	0	1	1.002	0.998007
	13.32	27.59	14.27	14.2	0.07	0.952638	1.002	0.950739
	13.13	27.43	14.3	14.2	0.1	0.933033	1.002	0.931173
	13.38	27.58	14.2	14.2	0	1	1.002	0.998007
	13.44	27.44	14	14.2	-0.2	1.1487	1.002	1.14641	1	0.0701062
			14.2			1.002
DN	13.45	26.04	12.59	14.2	-1.61	3.05252	1.002	3.04643
	13.51	26.18	12.67	14.2	-1.53	2.88786	1.002	2.8821
	13.58	26.38	12.8	14.2	-1.4	2.63902	1.002	2.63376
	13.64	26.34	12.7	14.2	-1.5	2.82843	1.002	2.82279
	13.69	26.54	12.85	14.2	-1.35	2.54912	1.002	2.54404
	13.73	26.33	12.6	14.2	-1.6	3.03143	1.002	3.02539
	13.78	26.58	12.8	14.2	-1.4	2.63902	1.002	2.63376	2.79832	0.199817
DN+Bre (30mg/kg)	13.05	26.15	13.1	14.2	-1.1	2.14355	1.002	2.13927
	13.12	26.08	12.96	14.2	-1.24	2.36199	1.002	2.35728
	13.18	26.02	12.84	14.2	-1.36	2.56685	1.002	2.56174
	13.23	26.37	13.14	14.2	-1.06	2.08493	1.002	2.08078
	13.28	26.25	12.97	14.2	-1.23	2.34567	1.002	2.34099
	13.33	26.4	13.07	14.2	-1.13	2.18859	1.002	2.18423
	13.38	26.43	13.05	14.2	-1.15	2.21914	1.002	2.21472	2.26843	0.163839
Group
Control	7	1±0.07
DN	7	2.80±0.2
DN+Bre (30mg/kg)	7	2.27±0.16

## Sheet: fig6B-1
Area	Aisle	CT	TM	Type	Gene	The sample name
A01	FAM	14.41	79	Unknown	B-actin	Control
A02	FAM	14.26	81.5	Unknown	B-actin	Control
A03	FAM	14.34	82	Unknown	B-actin	Control
A04	FAM	14.37	79.5	Unknown	B-actin	Control
A05	FAM	14.54	78	Unknown	B-actin	Control
A06	FAM	14.44	81	Unknown	B-actin	Control
A07	FAM	14.42	80.5	Unknown	B-actin	Control
A08	FAM	14.33	81.5	Unknown	B-actin	Control
A09	FAM	14.41	82	Unknown	B-actin	Control
A10	FAM	14.46	78	Unknown	B-actin	Control
A11	FAM	14.46	79.5	Unknown	B-actin	Control
A12	FAM	14.52	79	Unknown	B-actin	Control
B01	FAM	14.23	81.5	Unknown	B-actin	Control
B02	FAM	14.27	80.5	Unknown	B-actin	Control
B03	FAM	14.37	80	Unknown	B-actin	Control
B04	FAM	14.59	78	Unknown	B-actin	Control
B05	FAM	14.58	81.5	Unknown	B-actin	Control
B06	FAM	14.44	80.5	Unknown	B-actin	Control
B07	FAM	14.54	78.5	Unknown	B-actin	Control
B08	FAM	14.63	79.5	Unknown	B-actin	Control
B09	FAM	14.62	82	Unknown	B-actin	Control
B10	FAM	14.65	81	Unknown	B-actin	DN
B11	FAM	14.52	78	Unknown	B-actin	DN
B12	FAM	14.67	79.5	Unknown	B-actin	DN
C01	FAM	14.75	80.5	Unknown	B-actin	DN
C02	FAM	14.61	82	Unknown	B-actin	DN
C03	FAM	14.66	81	Unknown	B-actin	DN
C04	FAM	14.79	79.5	Unknown	B-actin	DN
C05	FAM	14.75	80.5	Unknown	B-actin	DN
C06	FAM	14.69	78.5	Unknown	B-actin	DN
C07	FAM	14.77	79	Unknown	B-actin	DN
C08	FAM	14.81	82	Unknown	B-actin	DN
C09	FAM	14.8	78.5	Unknown	B-actin	DN
C10	FAM	14.85	78	Unknown	B-actin	DN
C11	FAM	14.78	81.5	Unknown	B-actin	DN
C12	FAM	14.93	80	Unknown	B-actin	DN
D01	FAM	14.9	82	Unknown	B-actin	DN
D02	FAM	14.82	79.5	Unknown	B-actin	DN
D03	FAM	14.97	78	Unknown	B-actin	DN
D04	FAM	14.96	80.5	Unknown	B-actin	DN
D05	FAM	14.89	81	Unknown	B-actin	DN
D06	FAM	14.97	82	Unknown	B-actin	DN
D07	FAM	14.13	78.5	Unknown	B-actin	DN+Ber (30mg/kg)
D08	FAM	14.27	79	Unknown	B-actin	DN+Ber (30mg/kg)
D09	FAM	14.23	78	Unknown	B-actin	DN+Ber (30mg/kg)
D10	FAM	14.19	80.5	Unknown	B-actin	DN+Ber (30mg/kg)
D11	FAM	14.29	79	Unknown	B-actin	DN+Ber (30mg/kg)
D12	FAM	14.35	80.5	Unknown	B-actin	DN+Ber (30mg/kg)
E01	FAM	14.27	82	Unknown	B-actin	DN+Ber (30mg/kg)
E02	FAM	14.4	81	Unknown	B-actin	DN+Ber (30mg/kg)
E03	FAM	14.35	78.5	Unknown	B-actin	DN+Ber (30mg/kg)
E04	FAM	14.36	81.5	Unknown	B-actin	DN+Ber (30mg/kg)
E05	FAM	14.41	82	Unknown	B-actin	DN+Ber (30mg/kg)
E06	FAM	14.4	80.5	Unknown	B-actin	DN+Ber (30mg/kg)
E07	FAM	14.36	78	Unknown	B-actin	DN+Ber (30mg/kg)
E08	FAM	14.45	79.5	Unknown	B-actin	DN+Ber (30mg/kg)
E09	FAM	14.5	78.5	Unknown	B-actin	DN+Ber (30mg/kg)
E10	FAM	14.48	81	Unknown	B-actin	DN+Ber (30mg/kg)
E11	FAM	14.59	82	Unknown	B-actin	DN+Ber (30mg/kg)
E12	FAM	14.41	80.5	Unknown	B-actin	DN+Ber (30mg/kg)
F01	FAM	14.47	79.5	Unknown	B-actin	DN+Ber (30mg/kg)
F02	FAM	14.56	78	Unknown	B-actin	DN+Ber (30mg/kg)
F03	FAM	14.58	78.5	Unknown	B-actin	DN+Ber (30mg/kg)
F04	FAM	28.36	80	Unknown	α-SMA	Control
F05	FAM	28.33	81.5	Unknown	α-SMA	Control
F06	FAM	28.48	80.5	Unknown	α-SMA	Control
F07	FAM	28.48	81	Unknown	α-SMA	Control
F08	FAM	28.61	82	Unknown	α-SMA	Control
F09	FAM	28.52	79	Unknown	α-SMA	Control
F10	FAM	28.31	78.5	Unknown	α-SMA	Control
F11	FAM	28.23	79.5	Unknown	α-SMA	Control
F12	FAM	28.33	81.5	Unknown	α-SMA	Control
G01	FAM	28.21	80	Unknown	α-SMA	Control
G02	FAM	28.2	82	Unknown	α-SMA	Control
G03	FAM	28.24	81.5	Unknown	α-SMA	Control
G04	FAM	28.25	80.5	Unknown	α-SMA	Control
G05	FAM	28.24	78	Unknown	α-SMA	Control
G06	FAM	28.1	79.5	Unknown	α-SMA	Control
G07	FAM	28.54	79	Unknown	α-SMA	Control
G08	FAM	28.37	82	Unknown	α-SMA	Control
G09	FAM	28.42	81	Unknown	α-SMA	Control
G10	FAM	28.42	80	Unknown	α-SMA	Control
G11	FAM	28.48	80.5	Unknown	α-SMA	Control
G12	FAM	28.37	81.5	Unknown	α-SMA	Control
H01	FAM	26.72	82	Unknown	α-SMA	DN
H02	FAM	26.58	78	Unknown	α-SMA	DN
H03	FAM	26.59	79.5	Unknown	α-SMA	DN
H04	FAM	26.58	78.5	Unknown	α-SMA	DN
H05	FAM	26.73	79.5	Unknown	α-SMA	DN
H06	FAM	26.62	81.5	Unknown	α-SMA	DN
H07	FAM	26.79	80.5	Unknown	α-SMA	DN
H08	FAM	26.74	82	Unknown	α-SMA	DN
H09	FAM	26.84	79	Unknown	α-SMA	DN
H10	FAM	26.82	80.5	Unknown	α-SMA	DN
H11	FAM	26.8	81.5	Unknown	α-SMA	DN
H12	FAM	26.77	79.5	Unknown	α-SMA	DN

## Sheet: fig6B-2
Area	Aisle	CT	TM	Type	Gene	The sample name
A01	FAM	27.13	79.5	Unknown	α-SMA	DN
A02	FAM	27.04	79.5	Unknown	α-SMA	DN
A03	FAM	27	80	Unknown	α-SMA	DN
A04	FAM	26.9	81	Unknown	α-SMA	DN
A05	FAM	26.96	80.5	Unknown	α-SMA	DN
A06	FAM	26.78	82	Unknown	α-SMA	DN
A07	FAM	27.1	79.5	Unknown	α-SMA	DN
A08	FAM	27.08	79	Unknown	α-SMA	DN
A09	FAM	27.18	81	Unknown	α-SMA	DN
A10	FAM	26.97	80	Unknown	α-SMA	DN+Ber (30mg/kg)
A11	FAM	26.98	82	Unknown	α-SMA	DN+Ber (30mg/kg)
A12	FAM	27.11	80.5	Unknown	α-SMA	DN+Ber (30mg/kg)
B01	FAM	27.21	81.5	Unknown	α-SMA	DN+Ber (30mg/kg)
B02	FAM	27.04	78	Unknown	α-SMA	DN+Ber (30mg/kg)
B03	FAM	27.12	80.5	Unknown	α-SMA	DN+Ber (30mg/kg)
B04	FAM	27.38	81	Unknown	α-SMA	DN+Ber (30mg/kg)
B05	FAM	27.3	78.5	Unknown	α-SMA	DN+Ber (30mg/kg)
B06	FAM	27.25	82	Unknown	α-SMA	DN+Ber (30mg/kg)
B07	FAM	27.2	79.5	Unknown	α-SMA	DN+Ber (30mg/kg)
B08	FAM	27.17	78.5	Unknown	α-SMA	DN+Ber (30mg/kg)
B09	FAM	27.19	81.5	Unknown	α-SMA	DN+Ber (30mg/kg)
B10	FAM	27.15	80.5	Unknown	α-SMA	DN+Ber (30mg/kg)
B11	FAM	27.07	82	Unknown	α-SMA	DN+Ber (30mg/kg)
B12	FAM	27.02	79	Unknown	α-SMA	DN+Ber (30mg/kg)
C01	FAM	27.22	78.5	Unknown	α-SMA	DN+Ber (30mg/kg)
C02	FAM	27.38	81	Unknown	α-SMA	DN+Ber (30mg/kg)
C03	FAM	27.34	80.5	Unknown	α-SMA	DN+Ber (30mg/kg)
C04	FAM	27.11	80	Unknown	α-SMA	DN+Ber (30mg/kg)
C05	FAM	27.22	80.5	Unknown	α-SMA	DN+Ber (30mg/kg)
C06	FAM	27.14	82	Unknown	α-SMA	DN+Ber (30mg/kg)
C07	FAM	29.06	78.5	Unknown	podocin	Control
C08	FAM	29.21	78	Unknown	podocin	Control
C09	FAM	29.18	789.5	Unknown	podocin	Control
C10	FAM	29.31	82	Unknown	podocin	Control
C11	FAM	29.28	81.5	Unknown	podocin	Control
C12	FAM	29.15	80.5	Unknown	podocin	Control
D01	FAM	29.26	80	Unknown	podocin	Control
D02	FAM	29.29	81	Unknown	podocin	Control
D03	FAM	29.19	78	Unknown	podocin	Control
D04	FAM	29.29	79.5	Unknown	podocin	Control
D05	FAM	29.32	78.5	Unknown	podocin	Control
D06	FAM	29.33	79.5	Unknown	podocin	Control
D07	FAM	28.79	81.5	Unknown	podocin	Control
D08	FAM	28.94	80.5	Unknown	podocin	Control
D09	FAM	28.83	80	Unknown	podocin	Control
D10	FAM	29.19	82	Unknown	podocin	Control
D11	FAM	29.32	78.5	Unknown	podocin	Control
D12	FAM	29.15	78	Unknown	podocin	Control
E01	FAM	29.26	79.5	Unknown	podocin	Control
E02	FAM	29.22	81	Unknown	podocin	Control
E03	FAM	29.31	80.5	Unknown	podocin	Control
E04	FAM	30.16	79.5	Unknown	podocin	DN
E05	FAM	30.04	82	Unknown	podocin	DN
E06	FAM	30.16	79	Unknown	podocin	DN
E07	FAM	30.06	81	Unknown	podocin	DN
E08	FAM	29.89	81.5	Unknown	podocin	DN
E09	FAM	29.94	79.5	Unknown	podocin	DN
E10	FAM	30.49	81	Unknown	podocin	DN
E11	FAM	30.51	79.5	Unknown	podocin	DN
E12	FAM	30.4	78	Unknown	podocin	DN
F01	FAM	30.01	81	Unknown	podocin	DN
F02	FAM	30.05	78.5	Unknown	podocin	DN
F03	FAM	30.06	81	Unknown	podocin	DN
F04	FAM	30.08	79	Unknown	podocin	DN
F05	FAM	30	80	Unknown	podocin	DN
F06	FAM	30.14	81.5	Unknown	podocin	DN
F07	FAM	30.34	80.5	Unknown	podocin	DN
F08	FAM	30.39	80	Unknown	podocin	DN
F09	FAM	30.5	79	Unknown	podocin	DN
F10	FAM	30.44	80	Unknown	podocin	DN
F11	FAM	30.53	81.5	Unknown	podocin	DN
F12	FAM	30.45	80.5	Unknown	podocin	DN
G01	FAM	29.17	80.5	Unknown	podocin	DN+Ber (30mg/kg)
G02	FAM	29.29	79.5	Unknown	podocin	DN+Ber (30mg/kg)
G03	FAM	29.18	82	Unknown	podocin	DN+Ber (30mg/kg)
G04	FAM	29.21	80.5	Unknown	podocin	DN+Ber (30mg/kg)
G05	FAM	29.14	78	Unknown	podocin	DN+Ber (30mg/kg)
G06	FAM	29.29	82	Unknown	podocin	DN+Ber (30mg/kg)
G07	FAM	29.44	81.5	Unknown	podocin	DN+Ber (30mg/kg)
G08	FAM	29.55	81	Unknown	podocin	DN+Ber (30mg/kg)
G09	FAM	29.48	80	Unknown	podocin	DN+Ber (30mg/kg)
G10	FAM	29.87	79.5	Unknown	podocin	DN+Ber (30mg/kg)
G11	FAM	29.82	78	Unknown	podocin	DN+Ber (30mg/kg)
G12	FAM	29.85	81.5	Unknown	podocin	DN+Ber (30mg/kg)
H01	FAM	29.24	80.5	Unknown	podocin	DN+Ber (30mg/kg)
H02	FAM	29.34	78	Unknown	podocin	DN+Ber (30mg/kg)
H03	FAM	29.41	82	Unknown	podocin	DN+Ber (30mg/kg)
H04	FAM	29.57	81.5	Unknown	podocin	DN+Ber (30mg/kg)
H05	FAM	29.71	81	Unknown	podocin	DN+Ber (30mg/kg)
H06	FAM	29.58	80	Unknown	podocin	DN+Ber (30mg/kg)
H07	FAM	29.65	79.5	Unknown	podocin	DN+Ber (30mg/kg)
H08	FAM	29.67	82	Unknown	podocin	DN+Ber (30mg/kg)
H09	FAM	29.58	78	Unknown	podocin	DN+Ber (30mg/kg)

[truncated: 2 more sheets: a-SMA, podocin]
